# Supplementary material for: Precipitation Susceptibility in Marine Stratocumulus and Shallow Cumulus from Airborne Measurements
Source: Copernicus journal article supplement (doi:10.5194/acp-2016-161), 2016-03-14
Supplement: Supplementary file [file acp-2016-161-AC2-supplement.zip]

# Precipitation Susceptibility in Marine Stratocumulus and Shallow Cumulus from Airborne Measurements

Eunsil Jung<sup>1</sup>, Bruce A. Albrecht<sup>1</sup>, Armin Sorooshian<sup>2,3</sup>, Paquita Zuidema<sup>1</sup>, Haflidi H. Jonsson<sup>4</sup>

<sup>1</sup>Department of Atmospheric Sciences, University of Miami, Miami, FL, 33149, United States

<sup>2</sup>Department of Chemical and Environmental Engineering, University of Arizona, Tucson, AZ, 85721, USA

<sup>3</sup>Department of Hydrology and Atmospheric Sciences, University of Arizona, Tucson, AZ, 85721, USA

<sup>4</sup>Naval Postgraduate School, Monterey, CA, 93943, USA

Correspondence to: Eunsil Jung (eunsil.jung@gmail.com)

**Abstract.** Precipitation tends to decrease as aerosol concentration increases in warm marine boundary layer clouds at fixed liquid water path (LWP). The quantitative nature of this relationship is captured using the precipitation susceptibility ( $S_o$ ) metric. Previously published works disagree on the qualitative behavior of  $S_o$  in marine low clouds:  $S_o$  decreases monotonically with increasing LWP or cloud depth (H) in stratocumulus clouds (Sc), while it increases and then decreases in shallow cumulus clouds (Cu). This study uses airborne measurements from four field campaigns on Cu and Sc with similar instrument packages and flight maneuvers to examine if and why  $S_o$  behavior varies as a function of cloud type. The findings show that  $S_o$  increases with H and then decreases in both Sc and Cu. Possible reasons for why these results differ from those in previous studies of Sc are discussed.

## 1 Introduction

Cloud-aerosol interactions are considered to be one of the most important forcing mechanisms in the climate system (IPCC, 2013). It is believed that aerosols suppress precipitation in warm boundary layer clouds. However, there is considerable disagreement on the magnitude and even on the sign of how aerosol perturbations affect cloud fraction and lifetime (Stevens and Feingold, 2009). Furthermore, aerosol effects on clouds and precipitation are not readily separable from the effects of meteorology. The precipitation susceptibility metric,  $S_o$ , quantifies how aerosol perturbations alter the magnitude of the precipitation rate ( $R$ ) while minimizing the effects of macrophysical factors (i.e., meteorology) (Feingold and Siebert, 2009). It is defined as

$$S_o = - \frac{d \ln R}{d \ln N_d}, \quad (1)$$

and is evaluated at fixed cloud macrophysical properties, such as cloud thickness (H) or liquid water path (LWP). In Eq. (1), aerosol effects are embedded in the cloud droplet number concentration ( $N_d$ ) variable since aerosols serve as cloud condensation nuclei (e.g., as aerosol concentration increases,  $N_d$  increases). The minus sign is used in Eq. (1) to achieve a positive value of  $S_o$  due to the expectation that increasing aerosols reduce precipitation (all else fixed). [Towards improving](#)

Author

Deleted: with

the representation of precipitation in larger-scale models, the application of Eq. (1) has also been studied using more highly resolved models and remote sensing (e.g., Feingold and Siebert, 2009; Sorooshian et al., 2009; Terai et al., 2015; Hill et al., 2015). In the original work on  $S_o$  (Feingold and Siebert, 2009), cloud-base  $R$  and  $N_d$  were used. Since then, slightly different definitions of  $S_o$  have been applied. For example, Sorooshian et al. (2009) used an aerosol proxy (e.g., Aerosol Optical Depth and Aerosol Index) instead of  $N_d$  for their satellite data analysis. Terai et al. (2012, 2015) further defined precipitation susceptibility as the sum of the susceptibilities of drizzle intensity ( $S_I$ ) and drizzle fraction ( $S_f$ ),  $S_R = S_I + S_f$ , where  $S_I$  is analogous to  $S_o$  but calculated exclusively for clouds that produce measurable precipitation.  $S_I$  is equivalent to  $S_o$  only when 100 % of the sampled clouds are precipitating. Other studies focus on the probability of precipitation (POP), defined as the ratio of the number of precipitating events over the total number of cloudy events.  $S_{pop}$  is used in some studies of precipitation susceptibility (e.g., Wang et al., 2012; Mann et al., 2014; Terai et al., 2015), and is equivalent to the  $S_o$  used within Terai et al. (2012). In addition to the different definitions of precipitation susceptibility, various forms of  $R$  and  $N_d$  (e.g., cloud-base, vertically integrated, or ground-based values) with different data thresholds have been used for the calculation of the precipitation susceptibility depending on the data available. In this study, precipitation susceptibility indicates  $S_o$  as defined in Eq. (1) unless otherwise stated.

In global climate models (GCMs), these aerosol effects on precipitation are represented by either a prognostic scheme or an empirical diagnostic scheme. When GCMs consider aerosols, the rainrate  $R$  is often parameterized in terms of LWP and  $N_d$  as Eq. (2).

$$R = LWP^\alpha N_d^{-\beta}. \quad (2)$$

Climate models typically assume a fixed value of the autoconversion parameter ( $\beta$  in Eq. 2), ranging between approximately 0 and 2 (e.g., Rasch and Kristjansson, 1998; Khairoutdinov and Kogan, 2000; Jones et al., 2001; Rotstayn and Liu, 2005; Takemura et al., 2005).  $S_o$  in Eq. (1) is equivalent to the exponent  $\beta$  in Eq. (2) at fixed LWP. Field studies of precipitating stratocumulus (Sc) clouds have reported  $\beta$  values ranging from 0.8 to 1.75 at fixed LWP (e.g., Pawlowska and Brenguier, 2003; Comstock et al., 2004; vanZanten and Stevens, 2005; Lu et al., 2009). However, such single power law fits do not capture the changes in  $S_o$  with LWP or H, which is important since previous works have revealed that the response of cloud rainrates to aerosol perturbations vary as a function of LWP (or H).

The qualitative behavior of  $S_o$  has been studied for low clouds using models, remote sensing data, and in situ measurements. For model studies of warm cumulus clouds (e.g., the adiabatic parcel model of Feingold and Siebert, 2009),  $S_o$  varies from 0.5 to 1.1 with increasing LWP, and exhibits three regimes. At low LWP, not enough water is available with which to initiate rain, and  $S_o$  is insensitive to aerosol perturbations. At intermediate LWP, suppression of collision-coalescence by the increased aerosols is most effective. We will refer to this regime as the ascending branch of  $S_o$  following Feingold et al. (2013). At high LWP, the precipitation rate is more strongly influenced by the LWP, and  $S_o$  decreases with

Author

Deleted: of... $S_o$  (Feingold and Siebert, 2009) ... [1]

Author

Deleted: In an empirical scheme...when ... [2]

Author

Deleted: For f...eld studies of precipitating ... [3]

Author

Deleted: At low LWP,  $S_o$  is insensitive to aerosol perturbation where clouds do not precipitate.

increasing LWP (the descending branch of  $S_o$ ). This LWP-dependent pattern of  $S_o$  is supported by satellite observations (Sorooshian et al., 2009; 2010) and large-eddy simulations (LES) (Jiang et al., 2010) for warm trade cumulus clouds. In contrast, Terai et al. (2012) showed that  $S_R$  monotonically decreased with increasing LWP and H in Sc clouds based on in-situ measurements acquired during the VAMOS Ocean-Cloud-Atmosphere-Land Study-Regional Experiment (VOCALS-REx) field study, while their  $S_i$ , similar to  $S_o$  in aforementioned studies, did not reveal any significant change with H and maintained a value of  $\sim 0.6$ . These inconsistent results have raised questions of how cloud type impacts behavior of  $S_o$  as a function of either H or LWP.

To begin to unravel why differences in the various studies exist, Feingold et al. (2013) showed in modeling studies that the time available for collision-coalescence ( $t_c$ ) is critical for determining the LWP-dependent behavior of  $S_o$ , and may be at least partly responsible for some of the differences. Gettelman et al. (2013) also showed how the microphysical process rates impact  $S_o$  in the NCAR Community Atmosphere Model version 5 (CAM5) GCM. They showed that the behavior of  $S_o$  with LWP differs between the GCM and the steady-state model of Wood et al., (2009); the values of  $S_o$  were constant or decreased with LWP in the steady state model (consistent with Terai et al., 2012; Mann et al., 2014), whereas the GCM  $S_o$  behavior was more consistent with Feingold and Siebert (2009), Sorooshian et al. (2009, 2010), Jiang et al. (2010), Feingold et al. (2013), and Hill et al. (2015). Altered microphysical process rates were able to significantly change the magnitudes of  $S_o$ , but the qualitative behavior of  $S_o$  with LWP remained unchanged (i.e.,  $S_o$  increases with LWP, peaks at an intermediate LWP then decreases with LWP). More recently, Mann et al. (2014) analyzed 28 days of data from the Azores Atmospheric Radiation Measurement (ARM) Mobile Facility where the prevalent type of clouds are cumulus (20 %), cumulus under stratocumulus (10-30 %) and single-layer stratocumulus (10 %). They showed that  $S_{pop}$  slightly decreased with LWP. Terai et al. (2015) estimated precipitation susceptibility ( $S_i + S_{pop}$ ) in low-level marine stratiform clouds, which included stratus and stratocumulus clouds, using satellite data. The values of  $S_o$  in their study generally showed similar behavior to that reported by Mann et al. (2014). Hill et al. (2015) examined how the representation of cloud microphysics in climate model contributes to the behavior of  $S_o$ . They found that single-moment schemes, which are commonly used in GCMs, produce the largest uncertainty in  $S_o$ . Only through increasing the number of prognostic moments (i.e., multi-moment schemes capable of prognosing the rain droplet number as well as mass) could the dependence of  $S_o$  on a particular scheme be reduced.

The inconsistent behavior of  $S_o$  in previous studies for warm boundary layer clouds motivates the current study. The focus of this paper is to examine and compare the qualitative behavior of  $S_o$  in Cu and Sc using similar airborne measurements encompassing four field campaigns. Two were focused on Sc clouds (VOCALS-Rex and the Eastern Pacific Emitted Aerosol Cloud Experiment, Sect. 2.2) and two campaigns targeted Cu clouds (Barbados and Key West Aerosol Cloud Experiments, Sect. 2.3). The strength of these four field campaigns' airborne measurements is that the same research aircraft was deployed with a similar flight strategy and instrument packages, facilitating a comparative analysis. Each of the four field experiments sampled over an area of about  $100 \times 100$  km, and thus, the interrelationships examined are

Author  
Deleted: hereafter the ...escending branch ... [4]

Author  
Deleted: a global climate model (...he NCA' ... [5]

Author  
Deleted: This study is motivated by the...h ... [6]

representative of the GCM spatial resolution. Data and methods are discussed in Section 2, followed by results and discussion in Sections 3 and 4, respectively. The findings are summarized in Section 5. Acronyms used in this study are listed in Table A1 of the Appendix.

## 2 Data and methods

### 2.1 TO aircraft

The Center for Interdisciplinary Remotely Piloted Aircraft Studies (CIRPAS) Twin Otter (TO) research aircraft served as the principal platform from which observations for these four experiments were made. During these four deployments, the TO supported similar instrument packages, and performed similar cloud sampling maneuvers, including vertical soundings and level-leg flights below, inside, and above the clouds. Each research flight lasted ~3-4 hours. The TO included the following three *in-situ* probes for characterizing aerosol, cloud, and precipitation size distributions: the Passive Cavity Aerosol Spectrometer Probe (PCASP), Cloud Aerosol Spectrometer (CAS) and Cloud Imaging Probe (CIP), with each resolving particles of diameters 0.1–2.5  $\mu\text{m}$ , 0.6–60  $\mu\text{m}$  and 25–1550  $\mu\text{m}$ , respectively. A zenith-pointing 95-GHz Doppler radar was mounted on top of the aircraft and detected cloud and precipitation structures above the aircraft. Detailed information of the instruments on the TO and flight strategies is provided elsewhere (Zheng et al., 2011; Jung, 2012). All the instruments were operational during the flights analyzed in this study except for the cloud radar, which was not operational during the VOCALS TO flights.

$S_o$  is calculated from Eq. (1) within bins of the cloud thickness  $H$ .  $H$  was estimated as the height difference between cloud tops and bases. Cloud tops were determined by the cloud radar with a time resolution of 3 Hz and vertical resolution of 24 m (5 m) in height for Cu (Sc). Cloud bases of Cu were determined by the lifting condensation level (LCL) calculated from the average thermodynamic properties of the sub-cloud layer for a given day. The LCL varied little for Cu, for example, during the Barbados Aerosol Cloud Experiment (Sect. 2.3), the LCLs were  $653.9 \pm 146$  m on average from the aircraft measurements, which agreed with the two-year LCL climatology in this region ( $700 \pm 150$  m) as documented in Nuijens et al. (2014). Although it is not shown in this study,  $S_o$  was also estimated by using the cloud base heights determined from the Cu cloud-base level-leg flights; these results were similar to those based on the sub-cloud LCL.

In stratocumulus clouds, cloud tops are well defined due to the strong capping temperature inversion (see Zheng et al., 2011) and cloud bases vary more than tops (e.g., Fig. 2 of Bretherton et al., 2010). As a result, the way that the cloud-base is determined may affect  $S_o$  since the changes in cloud base alternatively can change the cloud thickness. Therefore, we estimate  $S_o$  using three different definitions for cloud base. The first method is with LCL calculated from the average thermodynamic properties of the sub-cloud layer (shown as cb-lcl in Fig. 4, same as Cu). For the second and third definitions (cb-local and cb-mean), cloud bases are determined from the lowest heights where the vertical gradients of liquid water

Author

Deleted: had...similar instrument packages ... [7]

Author

Deleted: consistently ...calculated from Eq. ... [8]

Author

Deleted: :...however...nd...cloud bases v... [9]

contents (LWC) are the greatest from the LWC profiles. The LWC profiles are obtained i) when the aircraft enters the cloud decks to conduct level legs (cb-local), and ii) from the nearest one or two soundings to the cloud-base level-leg flights. The average height of these two lowest heights (cb-mean, the average of i and ii) is used in this study, along with cb-lcl and cb-local (Fig. 4 later). In general, the heights approximately corresponded to the lowest heights that the liquid water contents (LWC) exceeded  $0.01 \text{ g m}^{-3}$ .  $S_o$  was also estimated by using the heights from the cloud-base level-leg flights as the cloud bases as did for  $C_u$ , and the qualitative behavior of  $S_o$  was preserved (not shown).

$N_d$  and  $R$  were calculated from the drop size distribution (DSD), which is obtained from CAS (forward scattering) and CIP probes during the cloud-base level-leg flights, respectively. The CAS probe acquires data every 10 Hz and then the DSDs at each channel are averaged to 1 Hz. The CIP acquires data every 1 second. The cloud radar samples at 3 Hz and then is averaged to 1 Hz to match the probe data. Therefore,  $N_d$ ,  $R$  and  $H$  in Eq. (1) were calculated in 1 s resolution (except for VOCALS-Rex, see Sect. 2.4). The impact of using one-second data on the  $S_o$  estimates will be discussed later in Sect. 3.2.  $R$  is defined as

$$R = \frac{\pi}{6} \int_{25\mu\text{m}}^{1550\mu\text{m}} N(D) D^3 u(D) dD, \quad (3)$$

where  $u(D)$  is the fall speed of a drop with diameter  $D$ . Three fall speed formulations are used: (1)  $u = k_1 r^2$  with  $k_1 \approx 1.19 \times 10^6 \text{ cm}^{-1} \text{ s}^{-1}$  was used for cloud droplets up to  $30 \mu\text{m}$  radius; (2)  $u = k_3 r$  with  $k_3 \approx 8 \times 10^3 \text{ s}^{-1}$  was used for the size range of  $40 \mu\text{m} < r < 0.6 \text{ mm}$ ; and (3)  $u = k_2 r^{1/2}$  with  $k_2 \approx 2.01 \times 10^3 \text{ cm}^{1/2} \text{ s}^{-1}$  for droplets of  $0.6 \text{ mm} < r < 2 \text{ mm}$ .

## 2.2 Stratocumulus cloud field campaigns: VOCALS-Rex and E-PEACE

From October to November 2008, the VAMOS Ocean-Cloud-Atmosphere-Land Study-Regional Experiment (VOCALS-REX) took place over the Southeast Pacific ( $69^\circ\text{W}$ - $86^\circ\text{W}$ ,  $12^\circ\text{S}$ - $31^\circ\text{S}$ ), an area extending from the near coastal region of northern Chile and southern Peru to the remote ocean (Zheng et al., 2011; Wood et al., 2011; also see Fig. 1). Three aircraft were deployed during VOCALS from 14 October to 15 November (NSF/NCAR C-130, DOE G-1, CIRPAS TO). The TO sampled more coastal marine stratocumulus decks near  $20^\circ\text{S}$   $72^\circ\text{W}$  (Fig. 1) than the other two planes. Readers should note that the data in Terai et al. (2012) used for their  $S_o$  calculations, were also obtained from VOCALS. However, their results were based on NSF/NCAR C-130 flights that sampled cloud decks away from the coastal area (Fig. 1). Wood et al. (2011) provide a comprehensive description of VOCALS experiments and Zheng et al. (2011) provide a description of TO aircraft data during the VOCALS. TO data from flights with decoupled boundary layers, abnormally higher cloud bases, and moist layers above cloud tops were excluded, reducing the total number of flights analyzed to thirteen from the original total of eighteen (Table 1).

Author  
Deleted: , where the

Author  
Deleted: ... [10]

Author  
Deleted: ...

Author  
Deleted: where  $u(D)$  ( $\text{m s}^{-1}$ ) is the terminal fall velocity following Gunn and Kinzer (1949) and  $N(D)$  ( $\text{m}^{-3} \text{ mm}^{-1}$ ) is the number of drops in a unit volume and given diameter interval  $dD$  centered at  $D$  (mm).

Author  
Deleted: Radar reflectivity  $Z$  is calculated from drop size distributions that were obtained from CAS and CIP probes. CAS DSD and CIP DSD were combined to include cloud droplets, rain embryo and drizzle drops,  $Z=10\log(z)$ , where ... [11]

Author  
Deleted: As one of the observational platf... [12]

From July to August 2011, the Eastern Pacific Emitted Aerosol Cloud Experiment (E-PEACE) took place off the coast of Monterey, California to better understand the response of marine stratocumulus to aerosol perturbations (Russell et al., 2013). E-PEACE included sampling controlled releases of i) smoke from the deck of the research vessel *Point Sur*, and ii) salt aerosol from the TO research aircraft, along with sampling ii) exhaust from container ships transiting across the study area (see Fig. 2 from Russell et al., 2013). During nine out of thirty E-PEACE flights, salt powder (diameter of 1-10  $\mu\text{m}$ ) was directly introduced into the cloud decks to examine the effects of giant cloud condensation nuclei (GCCN) on the initiation of warm precipitation (Jung et al., 2015). After excluding the seeding cases and the non-typical Sc decks, 13 flights remained from which we analyzed data (Table 1). Detailed information about E-PEACE and TO data can be found elsewhere (Russell et al., 2013; Wonaschütz et al., 2013).

### 2.3 Marine cumulus cloud field campaigns: BACEX and KWACEX

Shallow marine cumulus clouds are by far the most frequently observed cloud type over the Earth's oceans, yet remain poorly understood, and have not been investigated as extensively as oceanic stratocumulus. The marine environments in the Caribbean Sea and the Atlantic Ocean provide an excellent area to sample shallow marine cumulus clouds with a high propensity to precipitate. In addition, African dust is transported from westward off of Africa, periodically over the North-Atlantic, affecting clouds in its path including around Barbados and Key West, and thus providing an excellent opportunity to observe aerosol-cloud-precipitation interactions. To better understand such interactions in these trade cumuli regimes, the Barbados Aerosol Cloud Experiment (BACEX) was carried out off the Caribbean island of Barbados during mid March and mid April 2010 (Jung et al., 2013), and the Key West Aerosol Cloud Experiment (KWACEX) during May 2012 near Key West (Fig. 1). For the BACEX, we analyzed 12 flights (Table 1). Readers are referred to Jung et al. (2016) for detailed information about the cloud and aerosol properties during the BACEX. The marine atmosphere during KWACEX was dry overall. Six out of 21 flights sampled shallow marine cumulus clouds, of which four had sufficient data for analysis (Table 1).

### 2.4 $S_o$ calculation details

The distribution of  $N_d$  and  $R$ , with the corresponding  $H$ , is shown in Fig. 2 for each field campaign as scatter diagrams of  $N_d$  and  $R$ . All data shown in Fig. 2 were obtained during the cloud-base level-leg flights. The Southeast Pacific (SEP) Sc decks (VOCALS, Fig. 2a) were overall drier and more polluted than those in the Northeast Pacific (NEP) Sc decks (E-PEACE, Fig. 2c);  $R=0.03 \text{ mm day}^{-1}$  (median) and  $N_d=232 \text{ cm}^{-3}$  in VOCALS, but  $R=1.04 \text{ mm day}^{-1}$  and  $N_d=133 \text{ cm}^{-3}$  in E-PEACE. During E-PEACE, high  $N_d$  was observed in a few cases, (e.g.,  $N_d > 400 \text{ cm}^{-3}$  in Fig. 2c), and they were likely associated with the emitted aerosols from the ship exhaust and smoke (Russell et al., 2013; Wang et al., 2014; Sorooshian et al., 2015). The marine environments of the Caribbean Seas showed wide variations of  $R$  (e.g., order of  $10^{-2}$  to  $10^2 \text{ mm day}^{-1}$ ;

|                                                                             |
|-----------------------------------------------------------------------------|
| Author                                                                      |
| Deleted: combined                                                           |
| Author                                                                      |
| Deleted: (Twin Otter (TO), and                                              |
| Author                                                                      |
| Deleted: i                                                                  |
| Author                                                                      |
| Deleted: D                                                                  |
| Author                                                                      |
| Deleted: G                                                                  |
| Author                                                                      |
| Deleted: the other major oceanic warm cloud, Sc                             |
| Author                                                                      |
| Deleted: to Miami                                                           |
| Author                                                                      |
| Deleted: and s                                                              |
| Author                                                                      |
| Deleted: involved                                                           |
| Author                                                                      |
| Deleted: ing in                                                             |
| Author                                                                      |
| Deleted: among                                                              |
| Author                                                                      |
| Deleted: Figure 2 essentially shows that as $N_d$ increases, $R$ decreases. |
| Author                                                                      |
| Deleted: marine environments of                                             |
| Author                                                                      |
| Deleted: In a few cases, high $N_d$ is observed                             |
| Author                                                                      |
| Deleted: d                                                                  |
| Author                                                                      |
| Deleted: is                                                                 |
| Author                                                                      |
| Deleted:                                                                    |
| Author                                                                      |
| Deleted: are                                                                |
| Author                                                                      |
| Moved down [2]: (Fig. 2b and Fig. 2d)                                       |
| Author                                                                      |
| Moved (insertion) [2]                                                       |

Fig. 2b and Fig. 2d). In Fig. 2, The Barbados campaign sampled the most pristine environment of the four campaigns ( $N_d < 350 \text{ cm}^{-3}$ ,  $N_d = 61 \text{ cm}^{-3}$  on average), reflecting the isolated location of the island in the North Atlantic even though the experiment period included the most intense dust events during the year of 2010 (Jung et al., 2013). The marine environments near Key West was more polluted than Barbados throughout the KWACEX campaign (Fig. 2d,  $N_d = 206 \text{ cm}^{-3}$  on average).

$S_o$  was about 0.62 for E-PEACE (linear regression correlation coefficient  $r=0.34$ ), if calculated using all the individual 1 Hz data points shown in Fig. 2 where H ranges from ~100 m to 500 m. However,  $S_o$  was about 0.42 ( $r=0.21$ ) if one rainy day (shown as double circles in Fig. 1Q later) was excluded from the analysis, suggesting the artifact of wet scavenging (see Sect. 4), a different predominant cloud microphysical process (auto-conversion versus accretion) or the influence of macrophysical properties other than H. These E-PEACE  $S_o$  values agree with values estimated in previous campaigns in the same northeast Pacific region for H ~200-600 m:  $S_o \sim 0.46$ -0.48 using H and  $S_o \sim 0.60$ -0.63 using LWP (Lu et al., 2009).  $S_o$  during VOCALS is about 1.07 ( $r=0.46$ ) for H ~ 150-700 m. Overall,  $S_o$  values in this study are within the range of  $S_o$  from the previous field studies of precipitating stratocumulus clouds ( $S_o \sim 0.8$  to 1.75 for a fixed LWP in the studies of Pawlowska and Brenguier, 2003; Comstock et al., 2004; vanZanten and Stevens, 2005). Values of  $S_o$  for BACEX and KWACEX are about 0.89 ( $r=0.38$ ) and 0.77 ( $r=0.39$ ), respectively.

Although single power law fits for a given field campaign give the general sense of  $S_o$  values, they do not show the qualitative behavior of  $S_o$  with H, which reveals which thickness is most susceptible to aerosol perturbations. To further examine this,  $S_o$  is calculated by assigning  $R$  and  $N_d$  into the given intervals of cloud thickness for each campaign. The width of each H interval is taken to be 30 m for Sc and 50 m for Cu. The H intervals are arbitrary, but chosen to contain a similar number of data points within each interval and provide a robust  $S_o$  regardless of the interval choice. Within each H interval, we performed a linear regression to find a best fit for the natural log of the precipitation rate against natural log of  $N_d$ , and the  $S_d$  is the slope of the fit (see Fig. 3, Fig. 6, for example). Cloud data are included in the analysis if the given precipitation rate is greater than a threshold of  $0.001 \text{ mm day}^{-1}$ . The low  $R$  threshold is intended to include both non-precipitating and precipitating clouds. The impacts of the  $R$  threshold and H intervals on the  $S_o$  estimates are discussed in Appendix B and C, respectively. An example of  $S_o$  is shown in Fig. 3 from E-PEACE using every 1-second cloud data point (i.e.,  $N_d$  and  $R$ ) for H between 160 m and 190 m is shown in Fig. 3. The slope (i.e., linear fit) in Fig. 3 corresponds to an  $S_o$  value of 0.24. The value of  $S_o$  (0.24) is then plotted in the corresponding H on the H-  $S_o$  diagram (e.g., Fig. 4 at the H of 174 m, which corresponds to the average H of the interval). The same procedure is repeated for all H intervals to obtain the complete pattern of  $S_o$  with H. We tested and applied a few criteria in the  $S_o$  calculations, such as minimum  $R$  thresholds, and the total number of cloud data points and spans of  $N_d$  for a given H interval. Based on these sensitivity tests, we calculated  $S_o$  exclusively if  $N_d$  varied a sufficient amount (e.g.,  $d \ln(N_d)$  spans at least 2.2) for a given H interval since little variation of  $N_d$  does not provide the proper perturbation of aerosols. For example, in Fig. 3a,  $d \ln(N_d)$  spans about 3.5. Slightly different and

Author

Deleted: shows ...ampaign sampled the m ... [13]

Author

Deleted: ... [14]

Author

Deleted: The ...ingle power law fits by us ... [15]

broad~~er~~ criteria were applied for Cu mainly due to the larger number of data points sampled in Sc. However, the qualitative behavior of  $S_o$  was robust as long as the variation of  $N_d$  ~~was~~ sufficiently large, regardless of the other criteria, although the details were different (e.g., Fig. B1). Most of the slopes are statistically significant at the 99 % confidence level (e.g., filled symbols in Fig. 4). The number of data points used to calculate  $S_o$  and the linear correlations and the P-values indicating the statistically significant level of confidence for the fitted lines are summarized in Table A2 for given  $H$  intervals. Additionally,  $S_o$  is calculated by considering e-folding time and by randomly resampling the flights (Sect. 3.2), and the results are robust. This will be discussed later.

$S_o$  during VOCALS is calculated in slightly different ways from other experiments since the cloud radar failed. First,  $H$  is estimated from the vertical structure of LWC for each day (daily mean  $H$ ). Once  $H$  is determined for each flight, it is assigned to a certain  $H$  bin. For example,  $H$  of 9 Nov. ( $164 \pm 18$  m) and 10 Nov. ( $194 \pm 21$  m) are similar and thus assigned to the same  $H$  bin (i.e., group 1 in Table 1). VOCALS  $H$  is classified into four distinct groups. Once  $N_d$  and  $R$  are assigned to the corresponding  $H$ ,  $S_o$  then is estimated by using all the data points that are assigned to the  $H$  group.

LWP is commonly used as the macrophysical factor when quantifying Eq. (1). However, in this study, we use  $H$  as a macrophysical factor since we aim to compare  $S_o$  for both Sc and Cu.  $H$  corresponds well to LWP for adiabatic clouds, for which  $LWP \sim H^2$ . The adiabatic assumption, which may be valid in Sc, is not valid in Cu (Raubert et al., 2007; Jung et al., 2016) to calculate LWP. Further, even if we calculate LWP by integrating LWC with height (e.g., in Sc), we would obtain one LWP value for the entire cloud layer on a given day, as opposed to many  $H$  estimated from the cloud radar sampling at 3 Hz. Moreover, the TO did not carry an instrument that measures LWP directly such as a G-band Vapor Radiometer (e.g., Zuidema et al., 2012). Consequently, the direct comparison with previous results of  $S_o$  with LWP (e.g., quantitative) is not possible. We also note that LWC decreases as drizzle rates increase (e.g., see Fig. 8d of Jung et al., 2015). Consequently, clouds that are precipitating (higher  $R$ ) may have a LWP that is lower than the adiabatic value, and a cloud with a small  $R$  may have a LWP close to the adiabatic value. It should be also noted that the ranges of  $H$  (and possibly LWP) differ substantially between Cu and Sc. For example,  $H$  of Cu in this study can be as high as 1700 m, whereas  $H$  of Sc is generally less than 500 m (e.g., Fig. 4). Additionally,  $H$  for clouds that begin to precipitate may differ in Sc and Cu. Further, the LWP for clouds that precipitate would be sub-adiabatic and would have a smaller value of LWP than the LWP for non-precipitating clouds. Consequently,  $S_o$  that is calculated from cloud fields with diverse cloud types (e.g., Mann et al., 2014; Terai et al., 2015) may be complicated since LWP is shifted to smaller values for (heavily) precipitating clouds, and the  $H$  at precipitation initiation may differ between cloud types. In general, the results are used with caution when comparing with other studies in quantifying  $S_o$  since the dominating cloud process and the choices applied in how to calculate parameters involved with Eq. (1) can differ widely (e.g., Duong et al., 2011).

|                                                                                                                                                                                                             |
|-------------------------------------------------------------------------------------------------------------------------------------------------------------------------------------------------------------|
| Author                                                                                                                                                                                                      |
| Deleted: i                                                                                                                                                                                                  |
| Author                                                                                                                                                                                                      |
| Deleted: s. 1-2 in the Appendix).                                                                                                                                                                           |
| Author                                                                                                                                                                                                      |
| Deleted: The number of data points used to calculate the value of $S_o$ , and the (statistically significant) level of confidence for the fitted line, for a given $H$ interval, is summarized in Table A2. |
| Author                                                                                                                                                                                                      |
| Deleted: -                                                                                                                                                                                                  |
| Author                                                                                                                                                                                                      |
| Deleted:                                                                                                                                                                                                    |
| Author                                                                                                                                                                                                      |
| Deleted: [PZ: maybe say this when first mentioning the instruments also]during VOCALS.                                                                                                                      |
| Author                                                                                                                                                                                                      |
| Deleted: ,                                                                                                                                                                                                  |
| Author                                                                                                                                                                                                      |
| Deleted:                                                                                                                                                                                                    |
| Author                                                                                                                                                                                                      |
| Deleted: only                                                                                                                                                                                               |
| Author                                                                                                                                                                                                      |
| Deleted: without overlapping with $H$ from the next group                                                                                                                                                   |
| Author                                                                                                                                                                                                      |
| Deleted: with a similar daily $H$                                                                                                                                                                           |
| Author                                                                                                                                                                                                      |
| Deleted: same                                                                                                                                                                                               |
| Author                                                                                                                                                                                                      |
| Deleted: profile that could be used                                                                                                                                                                         |
| Author                                                                                                                                                                                                      |
| Deleted: which is inferior to $H$ that was estimated from the cloud radar with higher temporal resolution (3 Hz versus daily)                                                                               |
| Author                                                                                                                                                                                                      |
| Deleted: ,                                                                                                                                                                                                  |
| Author                                                                                                                                                                                                      |
| Deleted: . Besides,                                                                                                                                                                                         |
| Author                                                                                                                                                                                                      |
| Deleted: and the $H$ that begins the precipitation may differ from cloud types as discussed above                                                                                                           |
| Author                                                                                                                                                                                                      |
| Deleted: to                                                                                                                                                                                                 |



### 3 Results

#### 3.1 $S_o$ in Sc and Cu

In this section, we show  $S_o$  calculated in three different ways. First,  $S_o$  is calculated with 1-second data (Fig. 4) for BACEX, KWACEX, E-PEACE and VOCALS. Second,  $S_o$  is calculated with reduced data points that are averaged over the e-folding time of  $N_d$ . We show the results for BACEX, E-PEACE and VOCALS (Figs. 5 and 6). Lastly,  $S_o$  is calculated with randomly resampled E-PEACE flights (Figs. 8 and 9). We will show the results in turns.

$S_o$  as a function of H is shown in Fig. 4a for Cu.  $S_o$  is calculated from Eq. (1) with  $N_d$  and  $R$  that are sampled during the cloud-base level-leg flights at 1-second resolution. Cloud level-leg flights usually last 7-15 minutes on average, with an aircraft speed of 50-60 m s<sup>-1</sup>. In Fig. 4a,  $S_o$  during BACEX fluctuates around zero for clouds shallower than 500-600 m, above which  $S_o$  begins to increase rapidly with a peak of ~1.6 near H~1400 m. After that,  $S_o$  starts to decrease as H increases. The  $S_o$  during KWACEX follows  $S_o$  from BACEX, especially in the thicker cloud regime where the majority of KWACEX data were sampled.

The qualitative behavior of  $S_o$  for Sc is shown in Fig. 4b.  $S_o$  during E-PEACE shows H-dependent  $S_o$  patterns that are similar to those from BACEX. In the small H regime (H < 240 m),  $S_o$  is almost constant at ~0.2. For H > ~240 m,  $S_o$  increases gradually with increasing H and peaks at  $S_o \sim 1.0$  near H ~ 350-400 m. After that,  $S_o$  decreases with increasing H. Figure 4b further shows that the overall pattern of  $S_o$  is similar regardless of how the cloud bases were determined, although the H at which  $S_o$  peaks changes slightly (cb-mean, cb-local, cb-lcl).

During VOCALS,  $S_o$  increases with increasing H, from  $S_o \sim 0.1$  near 170 m to  $S_o \sim 0.5$  near 300 m. A minimum  $S_o$  value is shown near H ~ 640 m. The negative values of  $S_o$  in the largest H regime possibly result from uncertainties in the  $S_o$  estimation, or in unaccounted-for macrophysical properties, such as, cloud lifetime. The failure of the cloud radar during VOCALS was responsible for the fewer (four) H groups (Table 1). Additionally, no data were available for H ~ 350-600 m (Fig. 3), and thus, it is possible that  $S_o$  peaks anywhere between H values of 300 m and 600 m. The results of VOCALS clearly show the disadvantage of no cloud radar (i.e., high resolution of LWP or H) for the  $S_o$  estimates.

#### 3.2 $S_o$ calculated with an e-folding time and randomly resampled flights.

The dependence of 1-second data ( $N_d$ ,  $R$ ) on each other is tested two ways. First, we calculated  $S_o$  by considering the e-folding time scale (Leith, 1973), and, secondly, we calculated  $S_o$  by randomly resampling the flights. The e-folding time of  $N_d$  during E-PEACE was found to vary from four minutes to ten minutes, while the e-folding time of  $R$  varied from a few seconds to one to two minutes. The e-folding time of  $N_d$  within the VOCALS-TO flights varied from two to six minutes, and for the cloud-base precipitation was less than (or approximately) 1 minute (for a horizontal distance of less than 3 km, consistent with Terai et al., 2012). In the case of BACEX (Cu), the overall e-folding times were much shorter, varying from

Author

Deleted: with

Author

Deleted: ... $N_d$  and  $R$  that are sampled san ... [17]

Author

Deleted: around ... ~ values between ...50 ... [18]

Author

Deleted: Then, a...minimum  $S_o$  value is sl ... [19]

one-two minutes for  $N_d$  and less than one minute for  $R$ . The e-folding times of  $N_d$  and  $R$  are summarized in Table 1 for VOCALS, E-PEACE and BACEX. KWACEX was not included since there were only four flights.

We calculated  $S_d$  with data averaged over the upper bounds of the e-folding time (i.e., e-folding time of  $N_d$ ) for E-PEACE, BACEX and VOCALS flights, and the qualitative behaviour of  $S_d$  reported with 1-second data is unchanged:  $S_d$  increases with  $H$  then peaks before it decreases again (Fig. 5 for BACEX and E-PEACE and Fig. 6 for VOCALS). However, it should be noted that the  $H$  that  $S_d$  peaks at is shifted toward the lower  $H$  consistent with the results of Duong et al. (2011). The shift of  $H$  to the lower  $H$  is substantial in Sc where the overall  $H$  is smaller than  $H$  of Cu. Additionally, the effect of the  $H$ -interval on the  $S_d$  estimates is discussed in Appendix C. In general, the results are robust regardless of the  $H$  interval. However, if the  $H$  interval is chosen across a cloud thickness range in which  $S_d$  changes substantially, the pattern of  $S_d$  can be changed, indicating that the finer  $H$  interval provide a more accurate  $S_d$  variation.

Second, we estimated  $S_d$  by randomly resampling the flights of E-PEACE to see whether the sequential 1-second samples are statistically independent.  $S_d$  calculated with random flights, at first glance, showed two distinctive types of behavior (not shown, but similar to Fig. 8a shown later). One is a similar pattern to that of the current  $S_d$  shown in Fig. 4 while the other is an almost constant  $S_d$  near zero. The cloud data sampled during E-PEACE formed two groups (denoted as A and B in Figure 7). The  $S_d$  pattern calculated with cloud data of group A is similar to  $S_d$  shown in Fig. 4:  $S_d$  is constant at lower  $H$ , followed by increase then decrease (Fig. 8a). In contrast,  $S_d$  values calculated from group B were relatively constant near zero  $S_d$  with the descending branch only (blue in Fig. 8c). Further analysis revealed that the two RFs (RF13 and RF03) that have relatively small  $N_d$  with high  $R$  explain the differences in the  $S_d$  patterns (Fig. 9). If  $S_d$  is calculated with cloud data that do not include data from clean with heavy precipitating environments (i.e., RF13 and RF03),  $S_d$  shows a similar pattern as that in Fig. 4.

### 3.3 The effect of autoconversion and accretion processes on $S_d$

For cloud droplets to become raindrops (typical diameters of cloud droplets and drizzle drops are about 20 and 200  $\mu\text{m}$ , respectively (Rogers and Yau, 1989)), they have to increase in size significantly by the collision-coalescence process (autoconversion and accretion). Here, autoconversion primarily refers to faster-falling large cloud droplets that collect smaller cloud droplets in their paths as they fall through a cloud and grow larger; accretion refers to precipitation embryos that collect cloud droplets. In the intermediate LWP regime where  $S_d$  increases with LWP or  $H$  (ascending branch of  $S_d$ ) the auto-conversion process dominates. On the other hand, in the high LWP regime where  $S_d$  decreases with LWP or  $H$  (descending branch of  $S_d$ ) the accretion process dominates (Feingold and Siebert, 2009; Feingold et al., 2013). The transition from the dominance of autoconversion to accretion is reported to occur when  $D_e$  exceeds  $\sim 28 \mu\text{m}$ , and has been used as a rain initiation threshold in Sc (e.g., Rosenfeld et al., 2012). Jung et al. (2015) also showed that the precipitation embryos

Author

Deleted: The dependence of 1-second data ( $N_d$ ,  $R$ ) from one to another is tested two ways. First, we calculated  $S_d$  by considering the e-folding time scale (Leith, 1973), and, secondly, we calculated  $S_d$  by randomly resampling the flights. We find that the e-folding time of  $N_d$  during E-PEACE varies from about 4-6 minutes to 10 minutes, and an e-folding time of  $R$  varies from a few seconds to 1-2 minutes. The e-folding time of  $N_d$  within the VOCALS-TO flights varied between 2-6 minutes, and for the cloud-base precipitation was less than (or approximately) 1 minute (less than 3 km, consistent with Terai et al., 2012). In the case of BACEX (Cu), the overall e-folding times were much shorter, varying from 1-2 minutes for  $N_d$  and less than 1 minute for  $R$ . The e-folding times of  $N_d$  and  $R$  are summarized in Table 1 for VOCALS, E-PEACE and BACEX. KWACEX was not included since because there were only four flights. [20]

Author

Deleted: We calculated  $S_d$  with data averaged over the upper bounds of the e-folding time (i.e., e-folding time of  $N_d$ ) for E-PEACE, BACEX and VOCALS flights, and the qualitative behaviour of  $S_d$  reported with 1-second data is unchanged:  $S_d$  increase ... [21]

Author

Deleted: Figure 4 further shows that, in general,  $S_d$  tends to be overestimated as the size of data ... [21]

Author

Deleted: 2

Author

Deleted: A

Author

Deleted: A

Author

Deleted: P

Author

Deleted: in VOCALS-REx and E-PEACE

Author

Deleted: . Here autoconversion refers to the precipitation process caused by interactions ... [22]

Author

Deleted: f

Author

Deleted: the

Author

Deleted: process

Author

Deleted: the precipitation process caused by

appeared (and warm rain initiated) when the mean droplets diameters were slightly less than  $30\text{ }\mu\text{m}$  from the salt seeding experiments during E-PEACE, in the NEP Sc decks (e.g., see Table 3, Fig. 6a, and Fig. 7 in their study). Figure 10(a) shows that clouds during VOCALS consisted of numerous small droplets ( $D < 15\text{ }\mu\text{m}$  in Fig. 5a), which primarily are involved with the autoconversion process except for one flight ( $D \sim 37\text{ }\mu\text{m}$ , RF09, Nov. 1). The dominance of smaller droplets during VOCALS-TO flights agree with the dominance of ascending branch of  $S_o$  in Fig. 4(b). On the other hand, E-PEACE Sc clouds are composed of larger-sized droplets as well as small droplets (Fig. 10b).

#### 4 Discussion

This study shows the consistent behavior of  $S_o$  as a function of a key macrophysical cloud property regardless of cloud type; i.e.,  $S_o$  increases with increasing H (ascending branch) and peaks at intermediate H before  $S_o$  decreases with H (descending branch) in both Sc and Cu (Fig. 4). The results from marine cumulus clouds (BACEX and KWACEX) are consistent with previous modeling and observational studies of warm cumulus clouds (Sorooshian et al., 2009, 2010; Jiang et al., 2010; Duong et al., 2011; Feingold and Siebert, 2009; Feingold et al., 2013). However,  $S_o$  values estimated from marine stratocumulus clouds (E-PEACE and VOCALS) are inconsistent with previous in-situ observations of warm stratocumulus clouds (Terai et al., 2012; Mann et al., 2014), but are consistent with previous satellite observations of weakly precipitating Sc (Sorooshian et al., 2010), global climate model simulations (Gettelman et al., 2013; Hill et al., 2015), and box and parcel model studies (Feingold et al., 2013) of Sc.

Possible reasons for why the current results differ from those in previous studies of Sc are discussed here mainly by comparing results to those from the Terai et al. (2012) study. The inconsistent behaviors of  $S_o$  between our study and theirs may be due to a number of factors. One of the most fundamental reasons could be in the differences in the cloud fields that were sampled. In the SEP Sc decks, drizzle intensity and frequency tend to increase westward from the coast (e.g., Bretherton et al., 2010) and their dataset included several Pockets of Open Cells (POCs) with strong precipitation (personal communication with C. Terai). It should be noted that the VOCALS C130 flights (Terai et al., 2012) sampled the cloud fields along  $20^\circ\text{S}$  (mainly over the open Ocean), whereas the VOCALS TO flights sampled the Sc decks near the continents (Fig. 1). The westward increases in frequency and intensity of drizzle coincident with the westward decrease in aerosols and  $N_d$ , and also with larger LWP over the open ocean (e.g., Zuidema et al. 2012), suggesting that the discrepancy possibly is contributed to the different cloud microphysical process working on the cloud field (auto-conversion versus accretion processes). Indeed, Gettelman et al. (2013) showed that the accretion process dominated during VOCALS C-130 flights; the accretion to autoconversion ratio was above 1 for all LWP ranges during VOCALS observation (e.g., Fig. 5a in their studies). Therefore, the enhanced (major) accretion process appears as a descending branch of  $S_o$  predominantly. Hill et al.

|          |                                                                                                                                                                                                                                                                                                                                                                                                                                                                                                                                                                                                                                                                                                                                                                                                                                                                                                                                                                                                                                                                                                                                                                                                                                                                                                                                                                                                                                                                                                                                                                                                                                                                                                                                                                                                                                                                                                                         |
|----------|-------------------------------------------------------------------------------------------------------------------------------------------------------------------------------------------------------------------------------------------------------------------------------------------------------------------------------------------------------------------------------------------------------------------------------------------------------------------------------------------------------------------------------------------------------------------------------------------------------------------------------------------------------------------------------------------------------------------------------------------------------------------------------------------------------------------------------------------------------------------------------------------------------------------------------------------------------------------------------------------------------------------------------------------------------------------------------------------------------------------------------------------------------------------------------------------------------------------------------------------------------------------------------------------------------------------------------------------------------------------------------------------------------------------------------------------------------------------------------------------------------------------------------------------------------------------------------------------------------------------------------------------------------------------------------------------------------------------------------------------------------------------------------------------------------------------------------------------------------------------------------------------------------------------------|
| Author   |                                                                                                                                                                                                                                                                                                                                                                                                                                                                                                                                                                                                                                                                                                                                                                                                                                                                                                                                                                                                                                                                                                                                                                                                                                                                                                                                                                                                                                                                                                                                                                                                                                                                                                                                                                                                                                                                                                                         |
| Deleted: | C                                                                                                                                                                                                                                                                                                                                                                                                                                                                                                                                                                                                                                                                                                                                                                                                                                                                                                                                                                                                                                                                                                                                                                                                                                                                                                                                                                                                                                                                                                                                                                                                                                                                                                                                                                                                                                                                                                                       |
| Author   |                                                                                                                                                                                                                                                                                                                                                                                                                                                                                                                                                                                                                                                                                                                                                                                                                                                                                                                                                                                                                                                                                                                                                                                                                                                                                                                                                                                                                                                                                                                                                                                                                                                                                                                                                                                                                                                                                                                         |
| Deleted: | Figure 5a also shows that the size of droplets increases with increasing height, and thus, the overall cloud droplet sizes are slightly larger in the mid-cloud level (red) than those in the cloud-base level (black). Compared with VOCALS Sc decks, Fig. 6 shows that                                                                                                                                                                                                                                                                                                                                                                                                                                                                                                                                                                                                                                                                                                                                                                                                                                                                                                                                                                                                                                                                                                                                                                                                                                                                                                                                                                                                                                                                                                                                                                                                                                                |
| Author   |                                                                                                                                                                                                                                                                                                                                                                                                                                                                                                                                                                                                                                                                                                                                                                                                                                                                                                                                                                                                                                                                                                                                                                                                                                                                                                                                                                                                                                                                                                                                                                                                                                                                                                                                                                                                                                                                                                                         |
| Deleted: | Feingold et al. (2013) showed that time available for collision-coalescence $t_c$ influences the value of $S_o$ . That being said, an increase in $t_c$ shifts the balance of rain production from autoconversion to accretion with all else (e.g., LWP and/or H) being equal. Further, they showed that radar reflectivity Z is a good indicator of $t_c$ : higher Z coincides with longer $t_c$ . To examine how or whether $t_c$ relates to the discrepancy of $S_o$ responses in Sc between previous and current studies, Z with height is shown in Fig. 5b. Fig. 5c is the same as Fig. 5b, but H is used as y-ordinate. Figure 5c essentially shows that Z increases as cloud deepens, indicating a longer $t_c$ in the thicker clouds. Accordingly, accretion process would dominate (or play major roles) in the thicker cloud regimes, and in turn, $S_o$ estimated from the thicker clouds will show a descending branch of $S_o$ predominantly, whereas $S_o$ estimated from the thinner clouds will show an ascending branch of $S_o$ mainly, which are consistent with the behavior of $S_o$ in Fig. 4. In Fig. 5b-c, overall, Z calculated from the mid-cloud levels (red) are stronger than Z from cloud-base levels (black) (expect for extremely thick or thin clouds), indicating a longer $t_c$ for the clouds sampled at mid-cloud level compared with those sampled at cloud-base. The reversed reflectivity pattern shown in the extremely deep or shallow clouds (i.e., Z decreases with height) could be related to a different stage of cloud-life time (e.g., growth or dissipating). But it is not discussed here. Since longer $t_c$ shifts the balance of rain production from autoconversion to accretion, the accretion process would be dominated in the mid-levels, and thus, a descending branch of $S_o$ would be apparent in the clouds sampled at mid-level compared with ... [23] |
| Author   |                                                                                                                                                                                                                                                                                                                                                                                                                                                                                                                                                                                                                                                                                                                                                                                                                                                                                                                                                                                                                                                                                                                                                                                                                                                                                                                                                                                                                                                                                                                                                                                                                                                                                                                                                                                                                                                                                                                         |
| Deleted: | ; Hill et al., 2015                                                                                                                                                                                                                                                                                                                                                                                                                                                                                                                                                                                                                                                                                                                                                                                                                                                                                                                                                                                                                                                                                                                                                                                                                                                                                                                                                                                                                                                                                                                                                                                                                                                                                                                                                                                                                                                                                                     |
| Author   |                                                                                                                                                                                                                                                                                                                                                                                                                                                                                                                                                                                                                                                                                                                                                                                                                                                                                                                                                                                                                                                                                                                                                                                                                                                                                                                                                                                                                                                                                                                                                                                                                                                                                                                                                                                                                                                                                                                         |
| Deleted: | Although we compare our results with those of Terai et al. (2012), the issues discussed here apply to any results that used the same methods or data analysis as discussed here.                                                                                                                                                                                                                                                                                                                                                                                                                                                                                                                                                                                                                                                                                                                                                                                                                                                                                                                                                                                                                                                                                                                                                                                                                                                                                                                                                                                                                                                                                                                                                                                                                                                                                                                                        |
| Author   |                                                                                                                                                                                                                                                                                                                                                                                                                                                                                                                                                                                                                                                                                                                                                                                                                                                                                                                                                                                                                                                                                                                                                                                                                                                                                                                                                                                                                                                                                                                                                                                                                                                                                                                                                                                                                                                                                                                         |
| Deleted: | George and Wood, 2010                                                                                                                                                                                                                                                                                                                                                                                                                                                                                                                                                                                                                                                                                                                                                                                                                                                                                                                                                                                                                                                                                                                                                                                                                                                                                                                                                                                                                                                                                                                                                                                                                                                                                                                                                                                                                                                                                                   |
| Author   |                                                                                                                                                                                                                                                                                                                                                                                                                                                                                                                                                                                                                                                                                                                                                                                                                                                                                                                                                                                                                                                                                                                                                                                                                                                                                                                                                                                                                                                                                                                                                                                                                                                                                                                                                                                                                                                                                                                         |
| Deleted: | , which                                                                                                                                                                                                                                                                                                                                                                                                                                                                                                                                                                                                                                                                                                                                                                                                                                                                                                                                                                                                                                                                                                                                                                                                                                                                                                                                                                                                                                                                                                                                                                                                                                                                                                                                                                                                                                                                                                                 |

(2015) also showed that the monotonic decrease of  $S_o$  with LWP in case that the cloud data consist of exclusively larger particles (e.g., radius  $> 20 \mu\text{m}$ )

Second, the higher R threshold that Terai et al. (2012) used could contribute to the discrepancies. Terai et al. (2012) used  $R = 0.14 \text{ mm day}^{-1}$  as a minimum R threshold to estimate  $S_o$  where  $0.14 \text{ mm day}^{-1}$  corresponds to  $-15 \text{ dBz}$  from the Z-R relationship that they used ( $R = 2.01Z^{0.77}$  from Comstock et al., 2004). This R threshold is possibly too high to capture the autoconversion processes that occur in more lightly precipitating clouds such as clouds sampled during VOCALS TO flights. As a result, the high value of minimum R threshold may primarily capture the accretion process, which may contribute to the descending branch of  $S_o$  in their study. As an example, this R threshold rejects all the data in Fig. 2a (VOCALS TO flights) except for one day (RF09, Nov. 1) when the mean effective diameter is about  $37 \mu\text{m}$  and the accretion process dominates for the day. Further, the impact of the R threshold on the  $S_o$  estimates is evident in Fig. B2. Figure B2 shows that  $S_o$  decreases as the larger minimum R threshold is used, in particular at larger H. Figure 9 also shows how clouds of low  $N_d$  with high R (e.g., RF03 and RF13 of E-PEACE) alter the behavior of  $S_o$ . The choice of minimum R threshold can change the dataset that will be used for the estimates of  $S_o$ . The  $S_o$  metric is designed to show the impact of aerosols on precipitation; as aerosol increases, smaller sizes of numerous droplets form, and those droplets suppress the collision-coalescence process, and in turn, precipitation. Therefore, to study the extent that aerosols suppress precipitation, it would be more appropriate to encompass the full range of non-precipitating to precipitating clouds that include both autoconversion and accretion processes. It is also noted that the framework of precipitation susceptibility is to measure the impact of aerosol perturbations on the precipitation suppression, and thus, the concept of  $S_o$  may not adequately apply to the clouds that are already heavily precipitating since the accretion process has little dependence on  $N_d$ . In addition to decreasing the LWP, the precipitation itself can scavenge aerosols leading to lower  $N_d$ .

Third, the overall high values shown in Terai et al. (2012) ( $S_o$  begins with around 3 near H~50 m and ends with  $S_o \sim 0.8$  near H~500 m) may reflect the effects of wet scavenging (Fig. 7a; see also Duong et al., 2011), especially by considering that their dataset included several POCs with strong precipitation. We also noted that  $S_o$  calculated from the 13 E-PEACE flights was about 0.62. However,  $S_o$  calculated from 12 E-PEACE flights that excluded one rainy day was about 0.42, which is consistent with larger  $S_o$  in the presence of (heavy) precipitation possibly due to the wet scavenging (but it is also possible the lower  $S_o$  is due to the microphysical process). Consistently,  $S_o$  values calculated from 9 BACEX flights (Cu), which excluded three heavy precipitation cases, were also shifted to lower values than those estimated from the entire 13 flights (not shown).

Fourth, Terai et al. (2012) used column-maximum Z and then converted the Z to R by using a Z-R relationship for those time periods when the lidar could not determine the cloud-base height due to interference from heavy precipitation. This procedure can overestimate precipitation for a given  $N_d$ . If the procedure (i.e., overestimates of R) occurs in a low  $N_d$  regime (left half of the dotted line in Fig. 7b), the steeper slope (i.e., higher  $S_o$ ) would be obtained (Fig. 7b). If the procedure

Author

Deleted: First, ...erai et al. (2012) used R ... [24]

Author

Moved up [3]: Indeed, Gettelman et al. (2013) showed that the accretion process dominated during VOCALS C-130 flights; the accretion to autoconversion ratio was above 1 for all LWP ranges during VOCALS observation (e.g., Fig. 5a in their studies).

Author

Deleted: ...

Author

Moved (insertion) [3]

Author

Deleted: ...3 near H~50 m and ends with  $S_o$  ... [26]

Author

Deleted: when cloud-base was not determined from the lidar due to the attenuation by the heavy precipitation... This procedure can overestir... [27]

happens in a high  $N_d$  regime, the lower slope would be attained (Fig. 7c). Based on Fig. 1 of their study, the former scenario (Fig. 7b) would occur, resulting in higher  $S_o$  than expected.

Fifth, the Z-R relationship that Terai et al. (2012) used ( $R=2.01Z^{0.77}$ , followed Comstock et al. (2004)'s  $Z=25R^{1.3}$ ) derived for stratocumulus off the coast of Peru, using a shipboard scanning C-band radar. The  $S_c$  sampled during the VOCALS C-130 flights may have a different microphysical process from which the original Z-R relationship was derived. The microphysical processes are responsible for the formation of DSD, and the variability of DSD determines the theoretical limit of precipitation accuracy by radar via Z-R relationship. That being said, changes in DSD imply different Z-R relationships. The DSD variability (e.g., day to day, within a day, between physical processes and within a physical process) causes about 30-50 % of errors in  $R$  estimates with a single Z-R relationship (e.g., see Lee and Zawadzki, 2005 and references therein). Besides, the Comstock et al. (2004) Z-R relationship was derived from drop-sizes ranged from  $2\ \mu\text{m}$  to  $800\ \mu\text{m}$  in diameter (for drops larger than  $800\ \mu\text{m}$ , extrapolation was used). The  $S_c$  from VOCALS C-130 flights included several POCs, while the clouds that the Z-R relationship was derived were characterized by persistent  $S_c$ , sometimes continuous and other times broken with intermittent drizzle throughout. Therefore, using the Z-R relationship of Comstock et al. (2004) may result in some additional uncertainties in  $R$  estimates in Terai et al. (2012) as the error of Z-R relationship becomes larger in the bigger drop sizes ( $Z$  and  $R$  are proportional to  $\sim D^6$  and  $\sim D^4$ , respectively). Further, applying a Z-R relationship to W-band (3 mm) radar returns is not valid if there are any droplets greater than 1 mm since non-Rayleigh scattering (Mie effects) can dominate the radar reflectivity. Note that the Terai et al. (2012)  $R$  retrievals were made with a W-band radar. However, it is also true that the in-situ sampling of rain used in this study may miss a lot of raindrops because of the small sample volume of the probe. The errors in  $R$  estimates with a single Z-R relationship or  $R$  measured from probes, however, may not critically affect the differences in  $S_o$  between studies as the  $S_o$  metric (Eq. 1) is less sensitive to data uncertainty by using the logarithmic form of the data.

Lastly, Terai estimated  $N_d$  from the sub-cloud aerosols using an empirical relationship, which may also contribute to the differences. According to Jung (2012 in Fig. 4.5), the sub-cloud aerosols well represent the cloud-base  $N_d$  in the updraft regime, although these results are shown for the marine shallow cumulus clouds. Similarly, using the aerosol proxy from the satellite data for the  $S_o$  calculation also needs caution. Jung et al. (2016) showed that Aerosol optical depth (AOD) is not always a good indicator of the sub-cloud layer aerosols especially when the fine particles from long-distance continental pollution plumes reside above the boundary layer (e.g., Fig 4-5 their study). Mann et al. (2014) used a sub-cloud 10 m CCN (at 0.55 % super-saturation) for the  $S_o$  calculation and showed a decreasing trend of  $S_o$  with LWP as Terai et al. (2012) but their overall  $S_o$  is smaller than those estimated from other field studies. In cases where sub-cloud aerosols are used for the  $S_o$  estimates, these estimates give a smaller  $S_o$  than those using  $N_d$  due to the decreasing fraction of aerosol activated with  $N_d$  increasing, all else being equal (e.g., Lu et al., 2009)

- Author  
**Deleted:** was derived from  $S_c$  that was combined near Peru with off the coast of Mexico (ship measurement). The  $S_c$  during
- Author  
**Deleted:** Nevertheless, using a Z-R relationship is not an ideal, unless there are no alternatives and/or the microphysical processes are the same in the regions where the relationship is derived and where the relationship is applied. PZ I don't really agree with that. In-situ sampling of rain may miss a lot because of the small sample volume of the probe, e.g., Wood 2005 .
- Author  
**Deleted:** the usage of the assumption that Terai et al. (2012) made for the linear relationship between sub-cloud aerosol concentrations in the  $S_o$  matrix and cloud-base  $N_d$
- Author  
**Deleted:** .
- Author  
**Deleted:** linear relationship between
- Author  
**Deleted:** are
- Author  
**Deleted:** ted
- Author  
**Deleted:** and
- Author  
**Deleted:** is well established only
- Author  
**Deleted:** , and the linearity gets stronger as a function of updraft velocity
- Author  
**Deleted:** also assumed the linearity between
- Author  
**Deleted:** cloud-base  $N_d$  and
- Author  
**Deleted:** and
- Author  
**Deleted:** e
- Author  
**Deleted:** it gives

## 5 Conclusions

The suppression of precipitation due to the enhanced aerosol concentrations ( $N_a$ ) is a general feature of warm clouds. In this study we examined precipitation susceptibility  $S_o$  in marine low clouds by using in situ data obtained from four field campaigns with similar datasets; two of them focused on marine stratocumulus (Sc), and two targeted shallow cumulus (Cu) clouds. We estimate  $S_o$  with 1-second data, with data averaged over an e-folding time scale, and data subsampled randomly from flights, with the key results preserved regardless of the method used. This study shows that the maximum values of  $S_o$  are  $\sim 1.0$  for Sc and  $\sim 1.5$  for Cu, which are less than the values of  $S_o$  of  $\sim 2.0$  that climate models tend to use for the value of  $-\beta$  in Eq. 2. This study is the first to show with airborne data that for both Sc and Cu,  $S_o$  increases with increasing cloud thickness H and peaks at an intermediate H, before decreasing. For example, R is most susceptible for clouds of medium-deep depth, such as H  $\sim 380$  m for Sc in NEP where H varies between 100-450 m, and H  $\sim 1200$ -1400 m for Cu in the Caribbean Sea where H ranges from 200-1600 m. On the other hand, R is less susceptible to  $N_a$  in both shallow non-precipitating and deep heavily precipitating cloud regimes for both Sc and Cu. The results are consistent with previous studies of warm cumulus clouds, but inconsistent with those of warm marine stratocumulus clouds in-situ observations.

We suggest several possible reasons for why these results differ from those in previous studies of Sc, for example, by comparing with in-situ measurements of Terai et al. (2012). The sources of these uncertainties include the following: (i) geographical location of cloud decks that may be related to the predominant cloud microphysical process at work (e.g., accretion process), (ii) R threshold differences, (iii) wet scavenging effects (causing high values of  $S_o$ ), (iv) the use of maximum column Z to convert R under heavy rain conditions where cloud-base is not defined, (v) the use of the Z-R relationship to estimate  $R_v$  and (vi) the use of sub-cloud aerosols to estimate cloud-base  $N_d$ .

We also found that the details of  $N_d$  (e.g., Fig. B1) or how the cloud base is determined have little effect on both  $S_o$  values and the qualitative H-dependent behavior (Fig. 4). Further, here we emphasize and caution that the choice of the R threshold for the data analysis is important because the chosen threshold possibly can alter the character of the dataset used to calculate  $S_o$  by subsampling the data. For example, if a high value of the minimum R threshold is chosen in a dataset where the majority of data have low precipitation (e.g., VOCALS TO flights, Fig. 3a) and/or in the bimodal population of precipitation, the threshold would, by chance, eliminate/reduce the influence of the autoconversion process in favor of the accretion process. The VOCALS C-130 flight datasets are likely dominated by the accretion process occurring naturally (geographically remote ocean areas where POCs is often observed) and by the choice of high R thresholds.

The values of  $S_o$  in this study were calculated from in-situ measurements, and thus, no issues associated with the retrieval (e.g., satellite data), empirical relationships (e.g., Z-R relationship), or assumptions (e.g., relations between sub-cloud aerosols and cloud-base  $N_d$ ) are encountered for the calculation of  $S_o$ . A drawback, however, is the much smaller sampling volume of the in-situ microphysical probes compared to a radar volume, as this may generate an underestimate of the rainrate. Further, we calculated  $S_o$  separately for Cu and Sc to avoid any possible issues that may arise from combining

|          |                                                                                                  |
|----------|--------------------------------------------------------------------------------------------------|
| Author   |                                                                                                  |
| Deleted: | .                                                                                                |
| Author   |                                                                                                  |
| Deleted: | Lastly, to estimate $S_o$ for a given H and LWP interval, Terai et al. (2012) used 30 % ... [28] |
| Author   |                                                                                                  |
| Deleted: |                                                                                                  |
| Author   |                                                                                                  |
| Deleted: | .                                                                                                |
| Author   |                                                                                                  |
| Deleted: | . F                                                                                              |
| Author   |                                                                                                  |
| Deleted: | (ii) the location of in-cloud samp ... [29]                                                      |
| Author   |                                                                                                  |
| Deleted: | .                                                                                                |
| Author   |                                                                                                  |
| Deleted: | for the                                                                                          |
| Author   |                                                                                                  |
| Deleted: | estimates                                                                                        |
| Author   |                                                                                                  |
| Deleted: | linearity assumption between                                                                     |
| Author   |                                                                                                  |
| Deleted: | instead of                                                                                       |
| Author   |                                                                                                  |
| Deleted: | and                                                                                              |
| Author   |                                                                                                  |
| Deleted: | We also note that Z increases wit ... [30]                                                       |
| Author   |                                                                                                  |
| Deleted: | note                                                                                             |
| Author   |                                                                                                  |
| Deleted: | and R thresholds                                                                                 |
| Author   |                                                                                                  |
| Deleted: | (Appendix Fig. 1                                                                                 |
| Author   |                                                                                                  |
| Deleted: | ; however, the robust behavior of ... [31]                                                       |
| Author   |                                                                                                  |
| Deleted: | in the                                                                                           |
| Author   |                                                                                                  |
| Deleted: | by the adapted flight strategy (m ... [32]                                                       |
| Author   |                                                                                                  |
| Deleted: | and                                                                                              |
| Author   |                                                                                                  |
| Deleted: | linearity between                                                                                |

different cloud types (Sect. 2.4). The results, however, should be used with caution when comparing to other studies in quantifying  $S_o$  as the dominating cloud process and the choices applied to calculate the parameters in  $S_o$  estimates (Eq. 1) can differ widely.

The results of this work motivate future studies examining the same relationships with a more direct measurement of cloud depth using a cloud radar and/or LWP using a microwave radiometer, in addition to the instruments/sensors that measure/retrieve  $R$  and  $N_d$  ( $N_d$  is also desirable). For the flight strategy, in-cloud level legs at multiple altitudes (cloud-base, mid-cloud and cloud-top) with one sub-cloud level-leg would be ideal to calculate  $S_o$  and compare with other studies where  $S_o$  is calculated with cloud-base or vertically integrated variables. Level-legs near the ocean surface and sounding(s) to examine the background thermodynamic structures on a given day are also recommended.

Author

Deleted: mixing

Author

Deleted: of clouds

Author

Deleted: further

Author

**Deleted:** The precipitation susceptibility in this study, quantified by the changes in precipitation rate to the changes in cloud droplet concentrations in the cloud base, showed that  $R$  is most susceptible for clouds of medium-deep depth, such as  $H \sim 380$  m for Sc of which  $H$  varies between 100-450 m, and  $H \sim 1200$ -1400 m for Cu that  $H$  ranges from 200-1600 m. However,  $R$  is less susceptible to  $N_d$  in both shallow non-precipitating and deep heavily precipitating cloud regimes for both Sc and Cu. The inconsistent behaviors of  $S_o$  for the stratocumulus clouds between the current and previous studies are partly attributed to the predominant accretion process in the study area along with some assumptions and thresholds applied to the data analyses. in the previous studies. To capture the characteristic features of the suppression of precipitation rate as a function of aerosol loading, the lower  $R$  minimum threshold is desirable to use. Otherwise, the data will be skewed more to conditions where accretion dominates over autoconversion. Further studies on which range of  $H$  (or LWP) is most susceptible to precipitation rate would advance our understanding of aerosol impacts on precipitation.

[33]

**Table A1.** Table of acronyms and symbols.

| Acronym    | Expression                                                  |
|------------|-------------------------------------------------------------|
| BACEX      | Barbados Aerosol Cloud Experiment                           |
| CAS        | Cloud Aerosol Spectrometer                                  |
| CIP        | Cloud Imaging Probe                                         |
| Cu         | (Shallow marine) Cumulus (cloud)                            |
| DSD        | Drop Size Distribution                                      |
| E-PEACE    | Eastern Pacific Emitted Aerosol Cloud Experiment            |
| H          | Cloud thickness                                             |
| KWACEX     | Key West Aerosol Cloud Experiment                           |
| LCL        | Lifting Condensation Level                                  |
| LWC        | Liquid Water Content                                        |
| LWP        | Liquid water path                                           |
| $N_d$      | Cloud droplet number concentration                          |
| PCASP      | Passive Cavity Aerosol Spectrometer Probe                   |
| POCs       | Pockets of Open Cells                                       |
| R          | Rainfall (Precipitation) Rate                               |
| Sc         | Stratocumulus (clouds)                                      |
| $S_o$      | Precipitation susceptibility                                |
| TO         | Twin Otter                                                  |
| VOCALS-REx | VAMOS Ocean-Cloud-Atmosphere-Land Study-Regional Experiment |
| Z          | Radar reflectivity                                          |



**Table A2.** H interval and number of data points used in Fig. 4 for each field study.

| E-PEACE,<br>H (m)                  | H < 130                   | 130-160                                            | 160-190                                          | 190-220                              | 220-250                                 | 250-280                                  | 280-310                                  | 310-340                                  | 340-370                                  | 370-400                                  | 400-430                                  | H>430                                   |
|------------------------------------|---------------------------|----------------------------------------------------|--------------------------------------------------|--------------------------------------|-----------------------------------------|------------------------------------------|------------------------------------------|------------------------------------------|------------------------------------------|------------------------------------------|------------------------------------------|-----------------------------------------|
| E-PEACE<br>(cb-mean)<br>(#, r, P)  | 537<br>r=0.03<br>P=0.548  | 499<br>r=0.13<br><b>P=0.00</b><br>25               | 444<br>r=0.16<br><b>P=0.00</b><br>06             | 508<br>r=0.16<br><b>P=0.000</b><br>4 | 886<br>r=0.13<br><b>P=0.00</b><br>01    | 781<br>r=0.27<br><b>P&lt;0.00</b><br>001 | 606<br>r=0.41<br><b>P&lt;0.00</b><br>001 | 610<br>r=0.50<br><b>P&lt;0.00</b><br>001 | 821<br>r=0.58<br><b>P&lt;0.00</b><br>001 | 373<br>r=0.74<br><b>P&lt;0.00</b><br>001 | 97<br>r=0.43<br><b>P&lt;0.00</b><br>01   | 10<br>r=0.05<br>P=0.89                  |
| E-PEACE<br>(cb-local)<br>(#, r, P) | 530<br>r=0.07<br>P=0.09   | 482<br>r=0.14<br><b>P=0.00</b><br>29               | 582<br>r=0.11<br><b>P=0.00</b><br>76             | 683<br>r=0.12<br><b>P=0.001</b><br>5 | 726<br>r=0.14<br><b>P=0.00</b><br>02    | 474<br>r=0.20<br><b>P&lt;0.00</b><br>001 | 497<br>r=0.44<br><b>P&lt;0.00</b><br>001 | 525<br>r=0.48<br><b>P&lt;0.00</b><br>001 | 602<br>r=0.51<br><b>P&lt;0.00</b><br>001 | 758<br>r=0.62<br><b>P&lt;0.00</b><br>001 | 236<br>r=0.77<br><b>P&lt;0.00</b><br>001 | 77<br>r=0.56<br><b>P&lt;0.00</b><br>001 |
| E-PEACE<br>(cb-lcl)<br>(#, r, P)   | 514<br>r=0.03<br>P=0.46   | 379<br>r=0.07<br>P=0.19                            | 341<br>r=0.10<br>P=0.067                         | 255<br>r=0.10<br>P=0.102             | 489<br>r=0.17<br><b>P=0.00</b><br>02    | 823<br>r=0.20<br><b>P&lt;0.00</b><br>001 | 627<br>r=0.36<br><b>P&lt;0.00</b><br>001 | 621<br>r=0.45<br><b>P&lt;0.00</b><br>001 | 670<br>r=0.54<br><b>P&lt;0.00</b><br>001 | 389<br>r=0.46<br><b>P&lt;0.00</b><br>001 | 283<br>r=0.02<br>P=0.782                 | 781<br>r=0.05<br>P=0.17<br>4            |
| VOCALS<br>H (m)                    | Group1<br>170±27          | Group 2<br>225±46                                  | Group 3<br>307±24                                | Group 4<br>641±201                   | -                                       | -                                        | -                                        | -                                        | -                                        | -                                        | -                                        | -                                       |
| VOCALS<br>(#, r, P)                | 1113<br>r=0.04<br>P=0.161 | 1280<br>r=0.27,<br><b>P &lt;</b><br><b>0.00001</b> | 833<br>r=0.45<br><b>P &lt;</b><br><b>0.00001</b> | 224<br>r=0.14<br>P=0.042             | -                                       | -                                        | -                                        | -                                        | -                                        | -                                        | -                                        | -                                       |
| BACEX<br>H (m)                     | 0-250                     | 250-500                                            | 500-600                                          | 600-800                              | 800-<br>1000                            | 1000-<br>1250                            | 1250-<br>1500                            | H>1500                                   | -                                        | -                                        | -                                        | -                                       |
| BACEX<br>(#, r, P)                 | 23<br>r=0.03<br>P=0.88    | 89<br>r=0.03<br>P=0.76                             | 46<br>r=0.29<br>P=0.05                           | 87<br>r=0.12<br>P=0.25               | 52<br>r=0.60<br><b>P&lt;0.00</b><br>001 | 37<br>r=0.58<br><b>P=0.00</b><br>02      | 30<br>r=0.59<br><b>P=0.00</b><br>06      | 27<br>r=0.52<br><b>P=0.00</b><br>5       | -                                        | -                                        | -                                        | -                                       |
| KWACEX<br>H (m)                    | H<1500<br>m               | 1500-<br>1800                                      | H ><br>1800 m                                    | -                                    | -                                       | -                                        | -                                        | -                                        | -                                        | -                                        | -                                        | -                                       |
| KWACEX<br>(#, r, P)                | 56<br>r=0.23<br>P=0.095   | 32<br>r=0.52<br><b>P=0.00</b><br>2                 | 42<br>r=0.16<br>P=0.32                           | -                                    | -                                       | -                                        | -                                        | -                                        | -                                        | -                                        | -                                        | -                                       |

Author

**Deleted:** Table A2. H interval and number of data points used in Fig. 4 for each field study. .  
H < 130

... [34]

5 Numbers indicates that the total number of data points, followed by the linear regression correlation coefficient (r) and P-value (two-tailed t-test). Bold P-values indicate that correlations are statistically significant at the 99% confidence level.

Author

**Deleted:** .

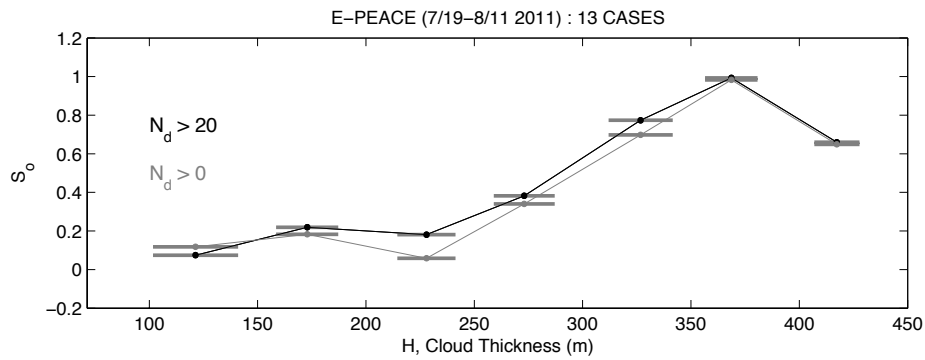

Figure B1. The sensitivity of  $S_d$  to  $N_d$  threshold values. One standard deviation of mean thickness for given H intervals are shown as horizontal bars.

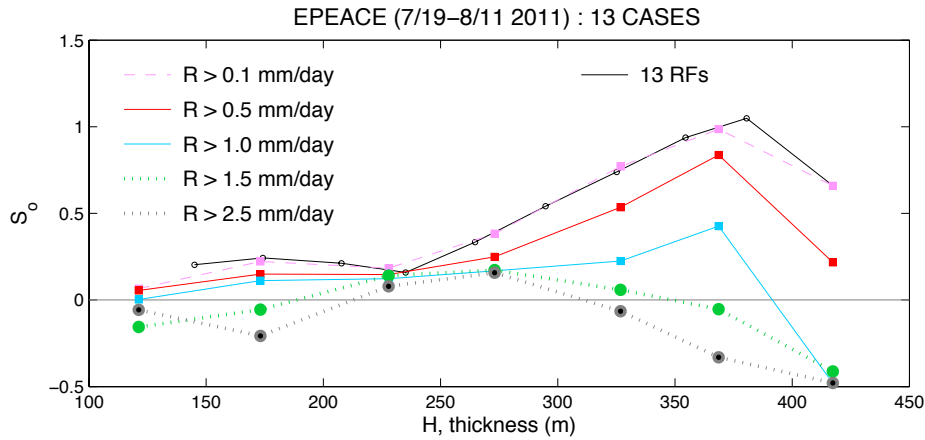

Figure B2. H-dependent precipitation susceptibility as a function of  $R$  threshold values.

Author  
Deleted: B  
Author  
Deleted: statistical independence of the 1-second data

$S_o$  calculated with different H intervals can be seen by comparing Fig. 4 and Fig. A1 as an example. H intervals in Fig. 4(b) are about 30 m, while H intervals in Fig. A1 are about 50 m. The qualitative H-dependent behavior of  $S_o$  is robust regardless of the chosen H intervals in case 1-second data are used. However, the chosen H interval may have effect on the estimate of  $S_o$  that is calculated with a fewer data points, such as  $S_o$  that is calculated with data averaged over the e-folding time.

The effect of H-intervals on  $S_o$  estimates, which is estimated with data averaged over the e-folding time, is shown in Fig. B1. In summary, the results are robust regardless of H interval in general. However, if the H interval is chosen across the cloud thickness where the  $S_o$  changes substantially (such as in which the cloud properties change substantially), the pattern of  $S_o$  can be changed, indicating that the finer H interval would provide more accurate  $S_o$ . This is shown in Figs. 7 and 8. In Fig. 7, an H interval of 50 m hides the variation of  $S_o$  between H 150 m and 200 m. The  $\ln(N_d)$  and  $-\ln(R)$  diagrams for H widths of 40 m and 50 m are shown in Fig. 7. However, in case that the  $S_o$  does not change substantially across the H intervals, the  $S_o$  does not change even if the larger H interval is used (e.g., Fig. 8d). For example,  $S_o$  calculated with subsets of data (e.g.,  $220 \leq H < 250$  m,  $250 \leq H < 280$  m,  $280 \leq H < 310$  m) are about  $\sim 0.24$  to  $0.25$ . If the  $S_o$  is estimated with all the data that fall into the three intervals (e.g.,  $H > 200$  m), the value is about 0.28, which is similar to three individual  $S_o$  values. The results may indicate that the cloud properties such as cloud thickness where the cloud begins to precipitate could be of importance for accurate estimates of  $S_o$  by affecting the optimal H interval and/or ranges.

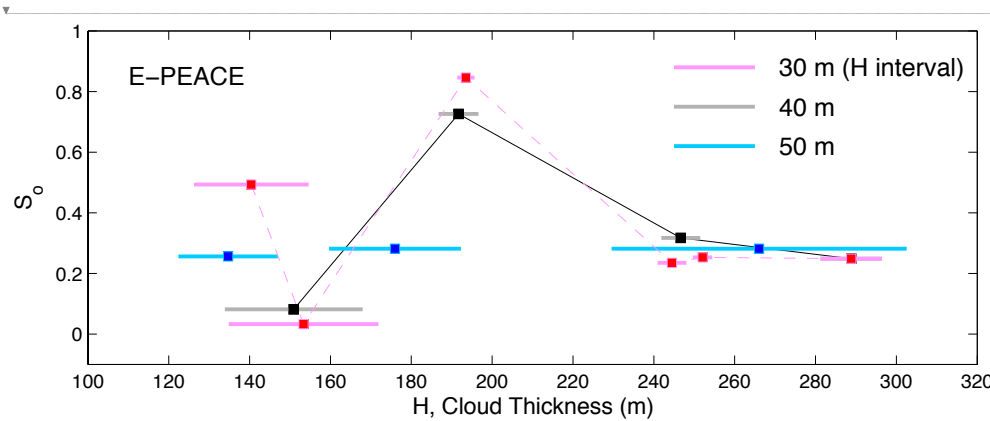

Author  
Deleted: . [35]

**Figure C1.**  $S_o$  is calculated with cloud data that are averaged over an e-folding time for E-PEACE.  $S_o$  calculated with three H intervals ( $\Delta 30$  m,  $\Delta 40$  m, and  $\Delta 50$  m) are shown. Horizontal bar indicates  $\pm 1\sigma$  cloud thickness for a given H interval.

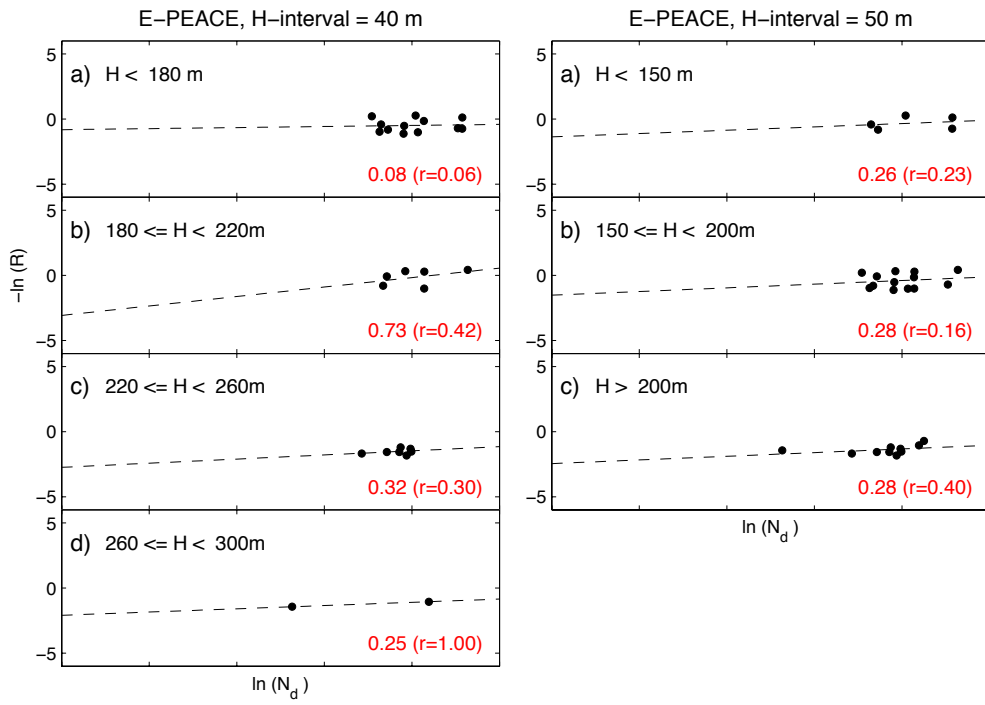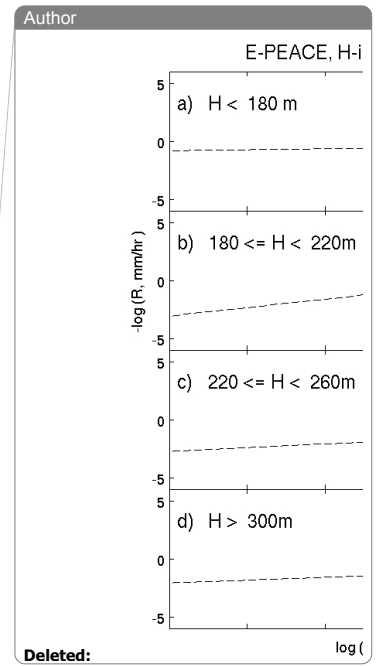

Figure C2. The  $\ln(N_d)$  and  $-\ln(R)$  diagrams with fixed H intervals: (left)  $\Delta H=40$  m, (right)  $\Delta H=50$  m.

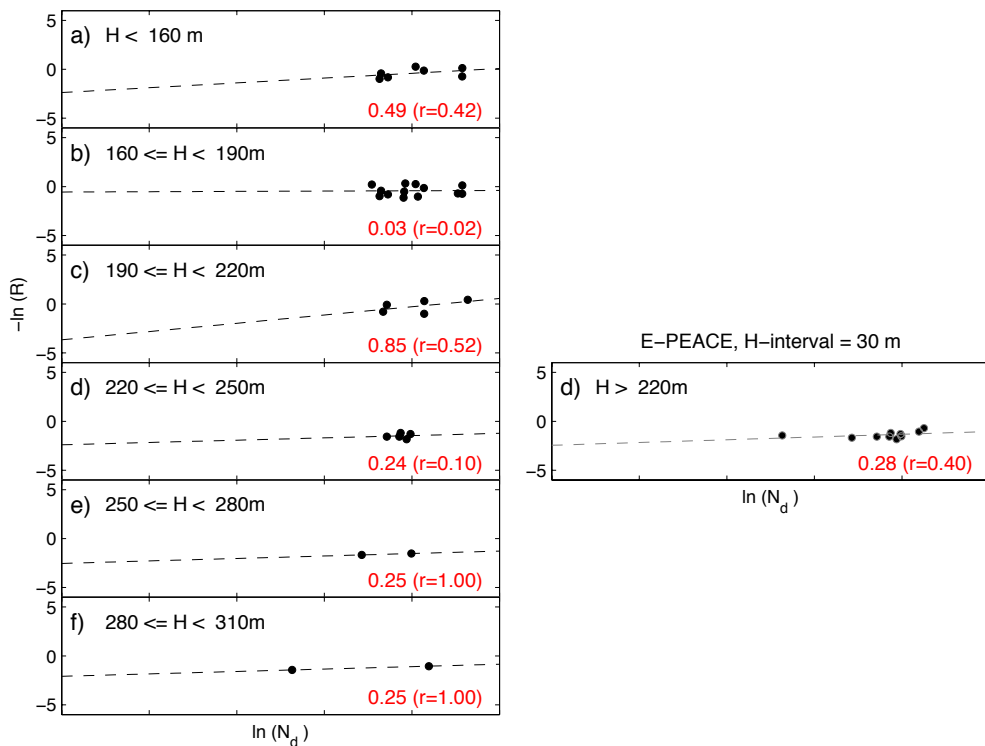

Figure C3. The  $\ln(N_d)$  and  $-\ln(R)$  diagrams with fixed H intervals ( $\Delta H=30$  m).

#### Acknowledgements

The authors gratefully acknowledge the crews of the CIRPAS Twin Otter for their assistance during these field campaigns. EJ acknowledges Chris Terai for his helpful discussion of the estimate of precipitation susceptibility. This study was funded by ONR Grants N000140810465, N00014-10-1-0811, N00014-16-1-2567, and NSF Grant AGS-1008848. We thank both reviewers for thoughtful suggestions and constructive criticism that have helped to improve the manuscript.

## References

- Bretherton, C. S., Wood, R., George, R. C., Leon, D., Allen, G., and Zheng, X.: Southeast Pacific stratocumulus clouds, precipitation and boundary layer structure sampled along 20 S during VOCALS-REx, *Atmos. Chem. Phys.*, 10, 10639–10654, doi:10.5194/acp-10-10639-2010, 2010.
- 5 Comstock, K. K., Wood, R., Yuter, S. E., and Bretherton, C. S.: Reflectivity and rain rate in and below drizzling stratocumulus, *Quart. J. Roy. Meteor. Soc.*, 130, 2891–2918, 2004.
- Duong, H. T., Sorooshian, A., and Feingold, G.: Investigating potential biases in observed and modeled metrics of aerosol-cloud-precipitation interactions, *Atmos. Chem. Phys.*, 11, 4027–4037, doi:10.5194/acp-11-4027-2011, 2011.
- Feingold, G. and Siebert, H.: In *Clouds in the Perturbed Climate System: Their Relationship to Energy Balance, Atmospheric Dynamics, and Precipitation*, edited by: Heintzenberg, J. and Charlson, R. J., Strüngmann Forum Reports, 2, Cambridge, MA: The MIT Press, 597, 2009.
- 10 Feingold, G., McComiskey, A., Rosenfeld, D., and Sorooshian, A.: On the relationship between cloud contact time and precipitation susceptibility to aerosol, *J. Geophys. Res.*, 118, 10544–10554, 2013.
- Gerber, H., Arends, B. G., and Ackerman, A. S.: A new microphysics sensor for aircraft use, *Atmos. Res.*, 31, 235–252, 15 1994.
- Gettelman, A., Morrison, H., Terai, C. R., and Wood, R.: Microphysical process rates and global aerosol–cloud interactions, *Atmos. Chem. Phys.*, 13, 9855–9867, doi:10.5194/acp-13-9855-2013, 2013.
- George, R. C. and Wood, R.: Subseasonal variability of low cloud radiative properties over the southeast Pacific Ocean, *Atmos. Chem. Phys.*, 10, 4047–4063, doi:10.5194/acp-10-4047-2010, 2010.
- 20 Intergovernmental Panel on Climate Change (IPCC): The Physical Science Basis. Contribution of Working Group I to the Fifth Assessment Report of the Intergovernmental Panel on Climate Change. Stocker, T.F., Qin, D., Plattner, G.-K., Tignor, M., Allen, S.K., Boschung, J., Nauels, A., Xia, Y., Bex, V. and Midgley, P.M. (eds.), Cambridge University Press, Cambridge, United Kingdom and New York, NY, USA, 2013.
- Jiang, H., Feingold, G., and Sorooshian, A.: Effect of aerosol on the susceptibility and efficiency of precipitation in trade cumulus clouds, *J. Atmos. Sci.*, 67, 3525–3540, 2010.
- 25 Jones, A., Roberts, D. L., Woodage, M. J., and Johnson, C. E.: Indirect sulphate aerosol forcing in a climate model with an interactive sulphur cycle, *J. Geophys. Res.*, 106, 20,293–20,310, doi:10.1029/2000JD000089, 2001.
- Jung, E.: Aerosol-Cloud-Precipitation Interactions in the Trade Wind Boundary Layer, PhD dissertation, 184pp, [http://scholarlyrepository.miami.edu/oa\\_dissertations/900](http://scholarlyrepository.miami.edu/oa_dissertations/900), 2012.
- 30 Jung, E., Albrecht, B. A., Feingold, G., Jonsson, H. H., Chuang, P., and Donaher, S. L.: Aerosols, Clouds, and Precipitation in the North-Atlantic Trades Observed During the Barbados Aerosol Cloud Experiment. Part I: Distributions and Variability, submitted to *Atmos. Chem. Phys.*, ACP, 2016.

Author

**Deleted:** Ayala, O., Rosa, B., Wang, L.-P., and Grabowski, W. W.: Effects of turbulence on the geometric collision rate of sedimenting droplets: Part I. Results from direct numerical simulation, *New J. Phys.*, 10, 075015, doi:10.1088/1367-2630/10/7/075015, 2008. [...](#) [36]

Author

**Deleted:** Gorge and Wood 2010 (from Terai)

Author

**Deleted:** [...](#)

- Jung, E., Albrecht, B. A., Prospero, J. M., Jonsson, H. H., and Kreidenweis, S. M.: Vertical structure of aerosols, temperature and moisture associated with an intense African dust event observed over the Eastern Caribbean, *J. Geophys. Res.*, 118, 4623–4643. doi: 10.1002/jgrd.50352, 2013.
- Jung, E., Albrecht, B. A., Jonsson, H. H., Chen, Y.-C., Seinfeld, J. H., Sorooshian, A., Metcalf, A. R., Song, S., Fang, M., and Russell, L. M.: Precipitation effects of giant cloud condensation nuclei artificially introduced into stratocumulus clouds, *Atmos. Chem. Phys.*, 15, 5645–5658, doi:10.5194/acp-15-5645-2015, 2015.
- Khairoutdinov, M., and Y. Kogan, Y.: A new cloud physics parameterization in a large-eddy simulation model of marine stratocumulus, *Mon. Weather Rev.*, 128, 229–243, 2000.
- Lee, G., and I. Zawadzki, I.: Variability of drop size distributions: time-scale dependence of the variability and its effects on rain estimation, *J. Appl. Meteor.*, 44, 241–255, doi:10.1175/JAM2183.1, 2005.
- Leith, C. E.: The Standard Error of Time-Average Estimates of Climatic Means, *J. Appl. Meteorol.*, 12, 1066–1069, doi:10.1175/1520-0450(1973)012<1066:TSEOTA>2.0.CO;2, 1973.
- Lu, M. -L., Sorooshian, A., Jonsson, H. H., Feingold, G., Flagan, R. C., and Seinfeld, J. H.: Marine stratocumulus aerosol-cloud relationships in the MASE-II experiment: Precipitation susceptibility in eastern Pacific marine stratocumulus, *J. Geophys. Res.*, 114, D24203, doi:10.1029/2009JD012774, 2009.
- Mann, J. A. L., Chiu, J. C., Hogan, R. J., O'Connor, E. J., L'Ecuyer, T. S., Stein, T. H. M., and Jefferson, A.: Aerosol impacts on drizzle properties in warm clouds from ARM Mobile Facility maritime and continental deployments, *J. Geophys. Res.*, 119, doi:10.1002/2013JD021339, 2014.
- Nuijens, L., Serikow, I., Hirsch, L., Lonitz, K., and Stevens, B.: The distribution and variability of low-level cloud in the North- Atlantic trades, *Q. J. Roy. Meteorol. Soc.*, 140, 2364–2374, 2014.
- Painemal, D., and Zuidema, P.: Assessment of MODIS cloud effective radius and optical thickness retrievals over the Southeast Pacific with VOCALS-REx in situ measurements, *J. Geophys. Res.*, 116, D24206, doi:10.1029/2011JD016155, 2011.
- Pawlowska, H. and Brenguier, J. L.: An observational study of drizzle formation in stratocumulus clouds for general circulation model (GCM) parameterizations, *J. Geophys. Res.*, 108(D15), 8630, doi:10.1029/2002JD002679, 2003.
- Rasch, P. J., and Kristjansson, J. E.: A comparison of the CCM3 model climate using diagnosed and predicted condensate parameterizations, *J. Climate*, 11, 1587–1614, 1998.
- Rauber, R. M., Ochs III, H. T., Di Girolamo, L., Goke, S., Snodgrass, E., Stevens, B., Knight, C., Jensen, J. B., Lenschow, D. H., Rilling, R. A., Rogers, D. C., Stith, J. L., Albrecht, B. A., Zuidema, P., Blyth, A. M., Fairall, C. W., Brewer, W. A., Tucker, S., Lasher-Trapp, S. G., Mayol-Bracero, O. L., Vali, G., Geerts, B., Anderson, J. R., Baker, B. A., Lawson, R. P., Bandy, A. R., Thornton, D. C., Burnet, E., Brenguier, J.-L., Gomes, L., Brown, P. R. A., Chuang, P., Cotton, W. R., Gerber, H., Heikes, B. G., Hudson, J. G., Kollias, P., Krueger, S. K., Nuijens, L., O'Sullivan, D. W., Siebesma, A. P., and Twohy, C. H.: Rain in shallow cumulus over the ocean, *B. Am. Meteorol. Soc.*, 88, 1912–1928, 2007.

Author

Deleted: .

- Rogers, R. R. and Yau, M. K.: A Short Course in Cloud Physics, Third Edition. International Series in Natural Philosophy, 290 pp, 1989.
- Rosenfeld, D., Wang, H., and P. J. Rasch, P. J.: The roles of cloud drop effective radius and LWP in determining rain properties in marine stratocumulus, *Geophys. Res. Lett.*, 39, L13801, doi:10.1029/2012GL052028, 2012.
- 5 Rotstayn, L. D., and Y. Liu, Y.: A smaller global estimate of the second indirect aerosol effect, *Geophys. Res. Lett.*, 32, L05708, doi:10.1029/2004GL021922, 2005.
- Russell, Lynn M., and Coauthors: Eastern Pacific Emitted Aerosol Cloud Experiment, *Bull. Amer. Meteor. Soc.*, 94, 709–729. doi: <http://dx.doi.org/10.1175/BAMS-D-12-00015.1>, 2013.
- Sorooshian, A., Feingold, G., Lebsock, M. D., Jiang, H., and Stephens, G.: On the precipitation susceptibility of clouds to aerosol perturbations, *Geophys. Res. Lett.*, 36, L13803, doi:10.1029/2009GL038993, 2009.
- 10 Sorooshian, A., Feingold, G., Lebsock, M. D., Jiang, H., and Stephens, G.: Deconstructing the precipitation susceptibility construct: improving methodology for aerosol-cloud-precipitation studies, *J. Geophys. Res.*, 115, D17201, doi:10.1029/2009JD013426, 2010.
- Sorooshian, A., Prabhakar, G., Jonsson, H., Woods, R., Flagan, R. C., and J. H. Seinfeld, J. H.: On the presence of giant particles downwind of ships in the marine boundary layer, *Geophys. Res. Lett.*, 42, doi:10.1002/2015GL063179, 2015.
- 15 Stevens, B., and Feingold, G.: Untangling aerosol effects on clouds and precipitation in a buffered system, *Nature*, 461, 607–613, 2009.
- Takemura, T., Nozawa, T., Emori, S., Nakajima, T. Y., and Nakajima, T.: Simulation of climate response to aerosol direct and indirect effects with aerosol transport-radiation model, *J. Geophys. Res.*, 110, D02202, doi:10.1029/2004JD005029, 2005.
- 20 Terai, C. R., Wood, R., Leon, D. C., and P. Zuidema, P.: Does precipitation susceptibility vary with increasing cloud thickness in marine stratocumulus?, *Atmos. Chem. Phys.*, 12, 4567–4583, 2012.
- Terai, C. R., Wood, R., and Kubar, T. L.: Satellite estimates of precipitation susceptibility in low-level marine stratiform clouds, *J. Geophys. Res.*, 120, 8878–8889, 2015.
- 25 vanZanten, M. C., Stevens, B., Vali, G., and Lenschow, D. H.: Observations of drizzle in nocturnal marine stratocumulus, *J. Atmos. Sci.*, 62, 88–106, 2005.
- Wang, Z., Sorooshian, A., Prabhakar, G., Coggon, M. M., and Jonsson, H. H.: Impact of emissions from shipping, land, and the ocean on stratocumulus cloud water elemental composition during the 2011 E-PEACE Field Campaign, *Atmos. Environ.*, 89, 570–580, doi.org/10.1016/j.atmosenv.2014.01.020, 2014.
- 30 Wonaschütz, A., Coggon, M., Sorooshian, A., Modini, R., Frossard, A. A., Ahlm, L., Mulmenstadt, J., Roberts, G. C., Russell, L. M., Dey, S., Brechtel, F. J., and Seinfeld, J. H.: Hygroscopic properties of smoke-generated organic aerosol particles emitted in the marine atmosphere, *Atmos. Chem. Phys.*, 13, 9819–9835, 10.5194/acp-13-9819-2013, 2013.

#### Author

**Deleted:** Rosenfeld, D., Lohmann, U., Raga, G. B., O'Dowd, C. D., Kul-mala, M., Fuzzi, S., Reissell, A., and Andreae, M. O.: Flood or Drought: How Do Aerosols Affect Precipitation?, *Science*, 312, 1309–1313, 2008.



- Wood, R., Kubar, T. L., and Hartmann, D. L.: Understanding the Importance of Microphysics and Macrophysics for Warm Rain in Marine Low Clouds. Part II: Heuristic Models of Rain Formation, *J. Atmos. Sci.*, 66, 2973–2990, doi:10.1175/2009JAS3072.1, 2009.
- 5 Wood, R., Mechoso, C. R., Bretherton, C. S., Weller, R. A., Huebert, B., Straneo, F., Albrecht, B. A., Coe, H., Allen, G., Vaughan, G., Daum, P., Fairall, C., Chand, D., Gallardo Klenner, L., Garreaud, R., Grados, C., Covert, D. S., Bates, T. S., Krejci, R., Russell, L. M., de Szoeko, S., Brewer, A., Yuter, S. E., Springston, S. R., Chaigneau, A., Toniazzi, T., Minnis, P., Palikonda, R., Abel, S. J., Brown, W. O. J., Williams, S., Fochesatto, J., Brioude, J., and Bower, K. N.: The VAMOS Ocean-Cloud-Atmosphere-Land Study Regional Experiment (VOCALS-REx): goals, platforms, and field operations, *Atmos. Chem. Phys.*, 11, 627–654, doi:10.5194/acp-11-627-2011, 2011.
- 10 Zheng, X., Albrecht, B., Jonsson, H. H., Khelif, D., Feingold, G., Minnis, P., Ayers, K., Chuang, P., Donaher, S., Rossiter, D., Ghate, V., Ruiz-Plancarte, J., and Sun-Mack, S.: Observations of the boundary layer, cloud, and aerosol variability in the southeast Pacific near-coastal marine stratocumulus during VOCALS-REx, *Atmos. Chem. Phys.*, 11, 9943–9959, doi:10.5194/acp-11-9943-2011, 2011.
- 15 Zuidema, P., Leon, D., Pazmany, A., and Cadetdu, M.: Aircraft millimeter-wave passive sensing of cloud liquid water and water vapor during VOCALS-REx, *Atmos. Chem. Phys.*, 12, 355–369, doi:10.5194/acp-12-355-2012, 2012.

**Table 1.** Dates used for this analysis during each experiment.

| No.      | VOCALS (Sc)                | E-PEACE (Sc)                                  | BACEX (Cu)                                  | KWACEX (Cu)                   |
|----------|----------------------------|-----------------------------------------------|---------------------------------------------|-------------------------------|
| Period   | Oct.-Nov., 2008            | July-Aug., 2011                               | Mar.-Apr., 2010                             | May, 2012                     |
| Location | Southeast Pacific Sc decks | Northeast Pacific Sc decks (California coast) | Barbados (Caribbean Sea and North Atlantic) | Key West (Caribbean Sea)      |
| RF1      | 10/16 (2), 232 [29,3]      | 7/19 [236,2]                                  | 3/22 [39,25]                                | 5/22 (1 <sup>st</sup> flight) |
| RF2      | 10/18 (3), 292±22 [152,2]  | 7/21 [669,144]                                | 3/23 [92,4]                                 | 5/22 (2 <sup>nd</sup> flight) |
| RF3      | 10/19 (3) 323±16 [402,28]  | 7/22 [610,39]                                 | 3/24 [69,1]                                 | 5/23                          |
| RF4      | 10/21 (1), 172 [376,2]     | 7/23 [369,20]                                 | 3/25 [68,8]                                 | 5/24                          |
| RF5      | 10/22 (2), 224 [364, N/A]  | 7/26 [258,131]                                | 3/26 [28,1]                                 | -                             |
| RF6      | 10/26 (2), 208 [395,11]    | 7/27 [702,7]                                  | 3/29 [103, N/A]                             | -                             |
| RF7      | 10/27 (1), 142±38 [336, 2] | 7/29 [731,17]                                 | 3/30 [526, N/A]                             | -                             |
| RF8      | 10/30 (2), 213 [311,170]   | 8/2 [395,1]                                   | 3/31 [184, 2]                               | -                             |
| RF9      | 11/1 (4), 641 [146,8]      | 8/3 [629,1]                                   | 4/5 [138,4]                                 | -                             |
| RF10     | 11/9 (1), 164±18 [392, 44] | 8/4 [378,19]                                  | 4/7 [171,7]                                 | -                             |
| RF11     | 11/10 (1), 194±21 [279, 1] | 8/5 [364,93]                                  | 4/10 [133,43]                               | -                             |
| RF12     | 11/12 (2), 249 [409, 66]   | 8/10 [721,1]                                  | 4/11 [123,5]                                | -                             |
| RF13     | 11/13 (1), 183 [174, 35]   | 8/11 [10,4]                                   | -                                           | -                             |

\*RF indicates the Research Flight. However, note that RFs from E-PEACE and VOCALS are not the same as RF from Russell et al. (2013) and Zheng et al. (2011), respectively.

\*The daily mean cloud thickness (mean±1σ) for VOCALS are shown with the H category (the group number is shown in the parenthesis). See the details in section 2.4.

\*Numbers inside brackets indicate e-folding time (seconds) of  $N_z$  and  $R$

Author  
Deleted: 24 or  
Author  
Deleted: 39 or

Author  
Moved (insertion) [4]

Author  
Deleted: T  
Author  
Deleted: for VOCALS

Author  
Moved up [4]: \*RF indicates the Research Flight. However, note that RFs from E-PEACE and VOCALS are not the same as RF from Russell et al. (2013) and Zheng et al. (2011), respectively.

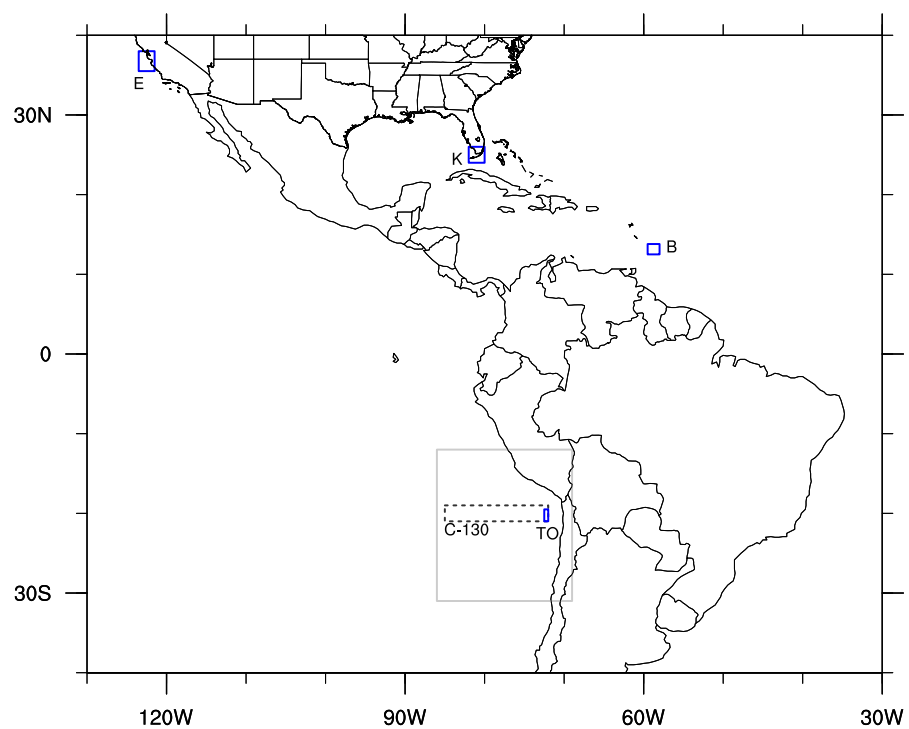

**Figure 1:** The geographical location of each field campaign (blue solid). E indicates E-PEACE, K indicates KWACEX, and B shows BACEX. The entire domain of VOCALS-REx is displayed as a solid grey box with domains of C-130 (dashed grey) and TO (solid blue) flights.

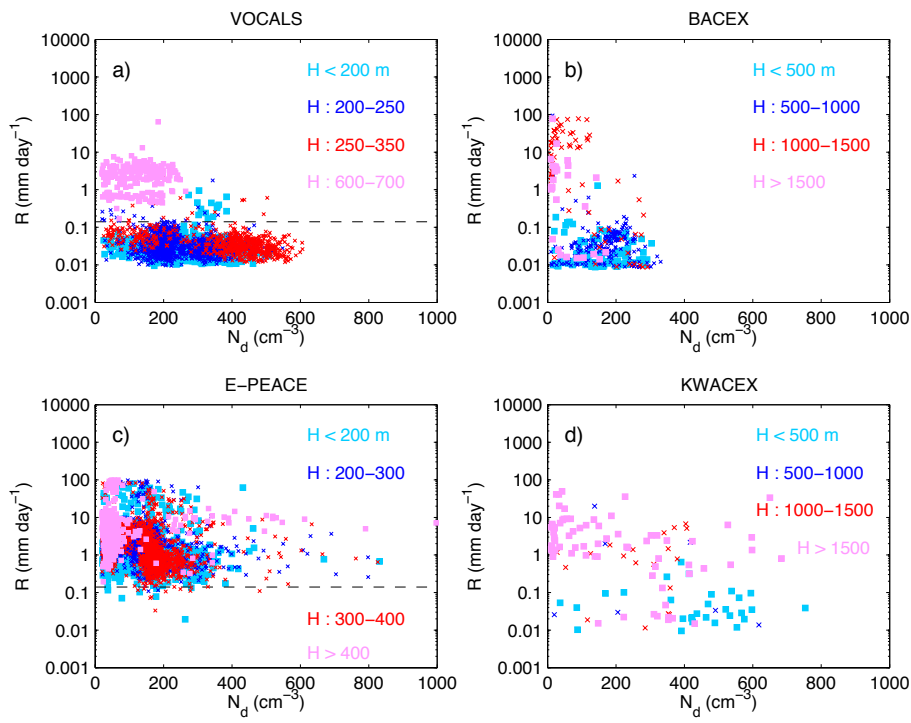

**Figure 2:** Scatter diagrams of cloud droplet number concentrations  $N_d$  and precipitation,  $R$ , for four field campaigns. Colors indicate cloud thickness  $H$ . The dashed line indicates an  $R$  value of  $0.14 \text{ mm day}^{-1}$ .

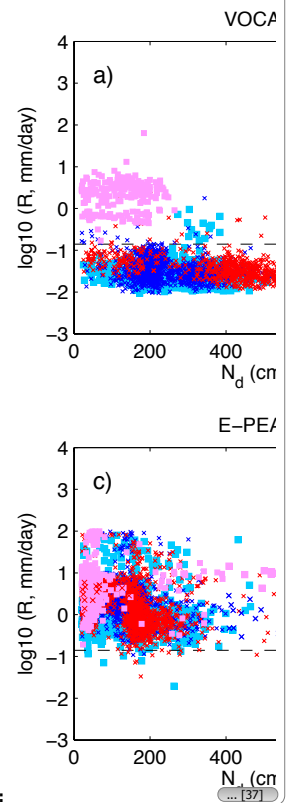

Deleted:

Author

Deleted:  $R$  increases upward in y ordinate and  $N_d$  increase toward the right direction in x abscissa.

Author

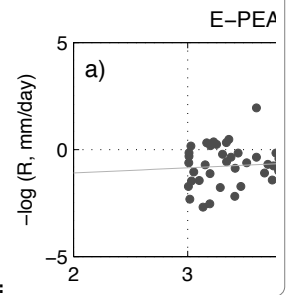

Deleted:

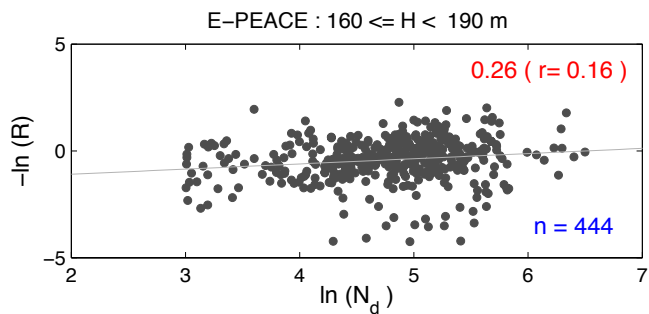

**Figure 3:** Examples of scatterplots used to calculate precipitation susceptibility  $S_p$  (i.e., the slope) for E-PEACE. Black dots indicate data points for an H interval between 160 m and 190 m. Numbers on the bottom right (blue) indicate the total number of data used.  $S_p$  and linear coefficient (r) values are shown in the upper right corner. Precipitation,  $R$ , increases downward in y ordinate, and  $N_d$  increases toward the right direction in x abscissa.

Author

E-PE/

a)

-5

0

5

-2

3

Deleted:

Author

Deleted: in each box

Author

Deleted: red

Author

Deleted: the  $S_p$  with a total number of data

Author

Deleted:

Author

Deleted: to calculate  $S_p$  inside the parentheses. Numbers on the upper right corner (blue) indicate the interval of sampling size. For example, N=7 in Fig. 3(c) shows data at every 7 seconds (in sequence) were used.

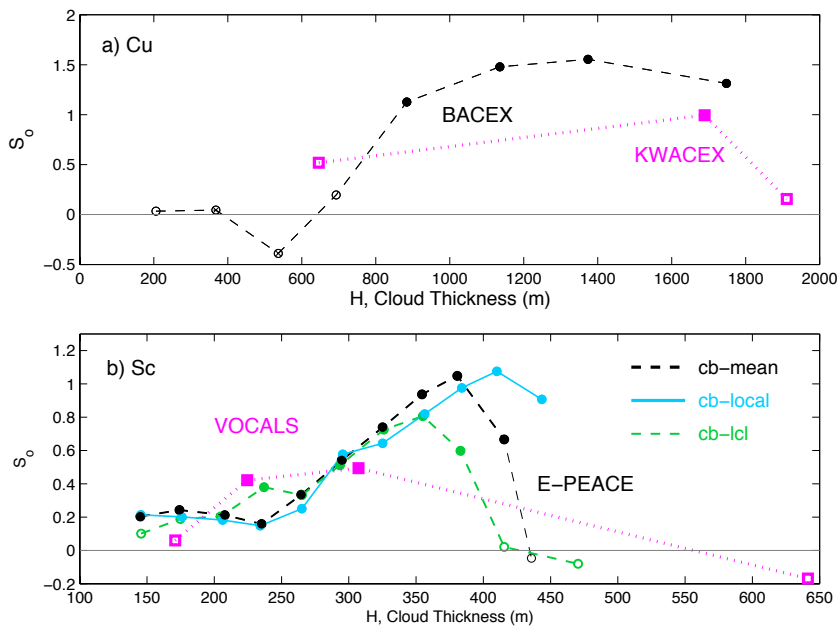

**Figure 4:** Precipitation susceptibility,  $S_o$ , estimated with aircraft measurements for (a) Cu (12 flights of BACEX and four flights of KWACEX) and (b) Sc (13 flights of E-PEACE and VOCALS-REx). E-PEACE  $S_o$  is estimated from (i) the cloud base height, which is identified using LCL (cb-lcl) and (ii) from the vertical structures of LWCs (lowest height that the vertical gradient of LWC is the greatest) as the aircraft enters to the cloud deck to conduct the cloud-base level leg flight (cb-local), and (iii) from the averaged cloud-base heights from the nearby soundings and cb-local (cb-mean). Filled circles are statistically significant at 99 % confidence level. The number of data points used for  $S_o$  estimates and their statistical significance are shown in Table A2.

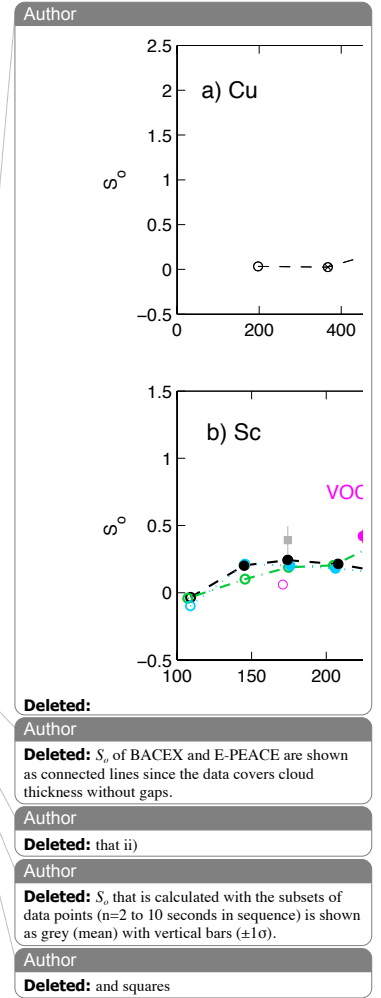

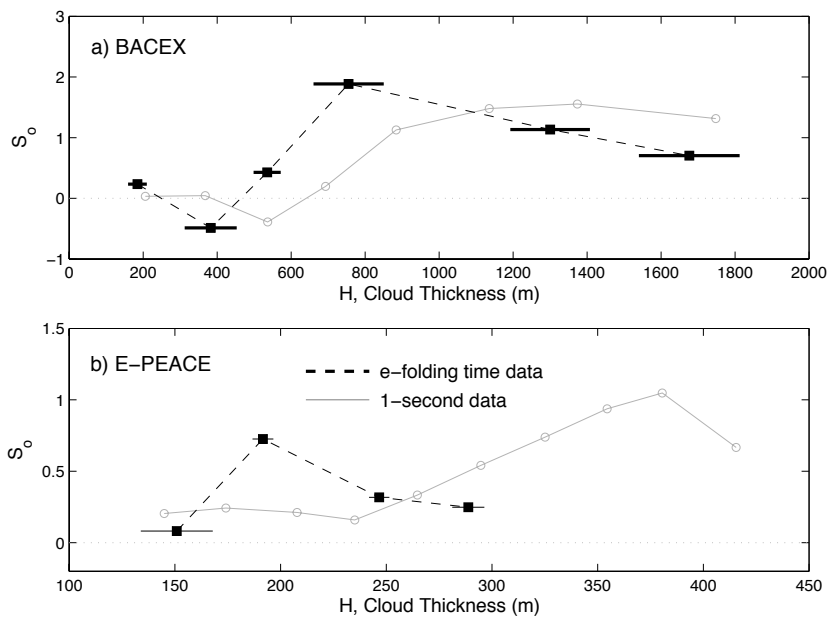

**Figure 5.**  $S_0$  estimated with aircraft measurements for (a) BACEX (Cu) and (b) E-PEACE (Sc). The 1-second data of individual flights are reduced by averaging over the e-folding time of  $N_d$  for each flight prior to the calculation.

Author  
Deleted: day

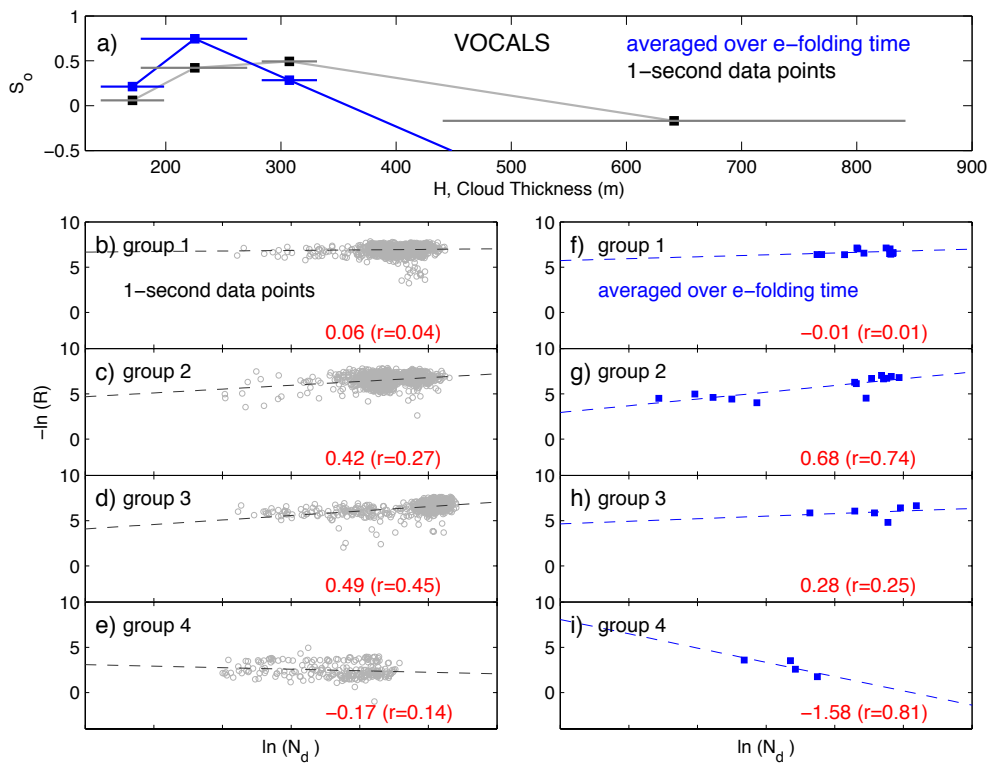

**Figure 6.**  $S_0$  for VOCALS TO flight is calculated with 1-second data (grey) and cloud data that are averaged over an e-folding time for each day (blue). The  $\ln(N_d)$  and  $-\ln(R)$  diagram is shown for each H interval. The horizontal bar in (a) indicates  $\pm 1\sigma$ .  $S_0$  is calculated for the cloud data in groups with similar H (shown in Table 1).

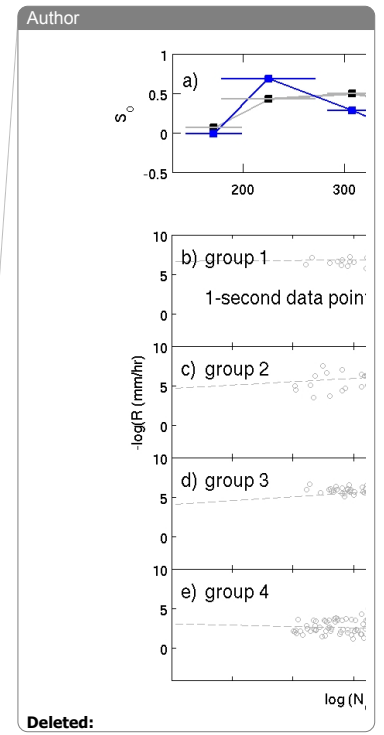



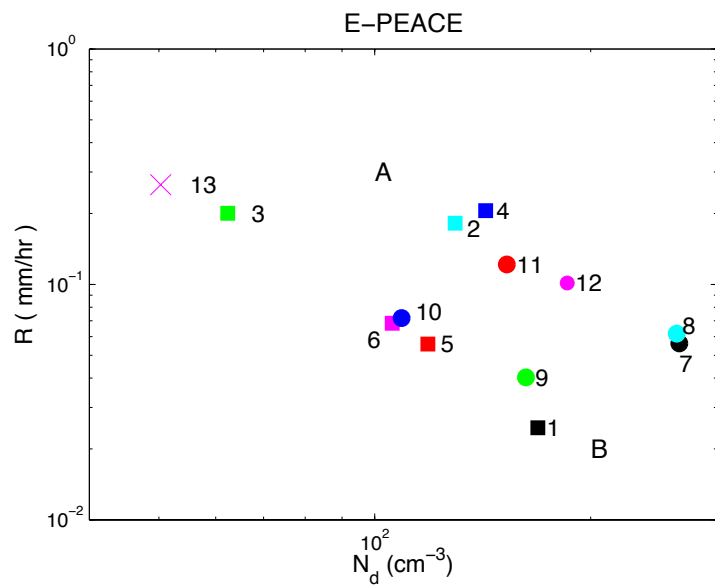

**Figure 7.** Daily mean values of  $N_d$  and  $R$  for the 13 E-PEACE flights. Numbers indicate the flight numbers shown in Table 1.

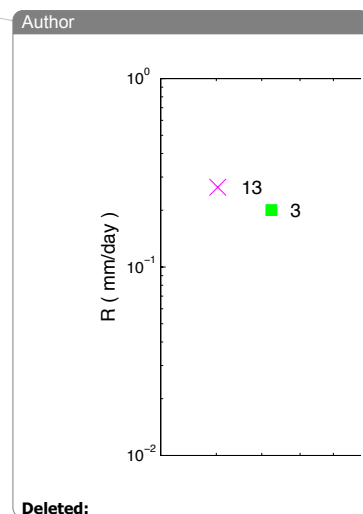

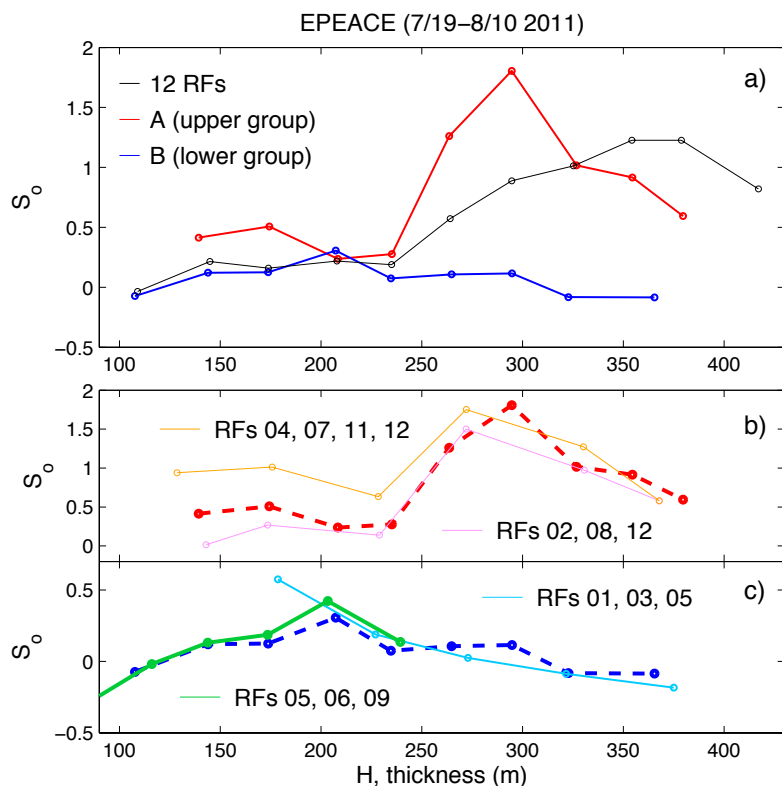

**Figure 8.**  $S_0$  as a function of cloud thickness for (a) 12 E-PEACE flights, for groups A and B shown in Fig. 7. (b)  $S_0$  calculated with randomly resampled RFs within groups (b) A and (b) B. RFs indicate Research Flights.

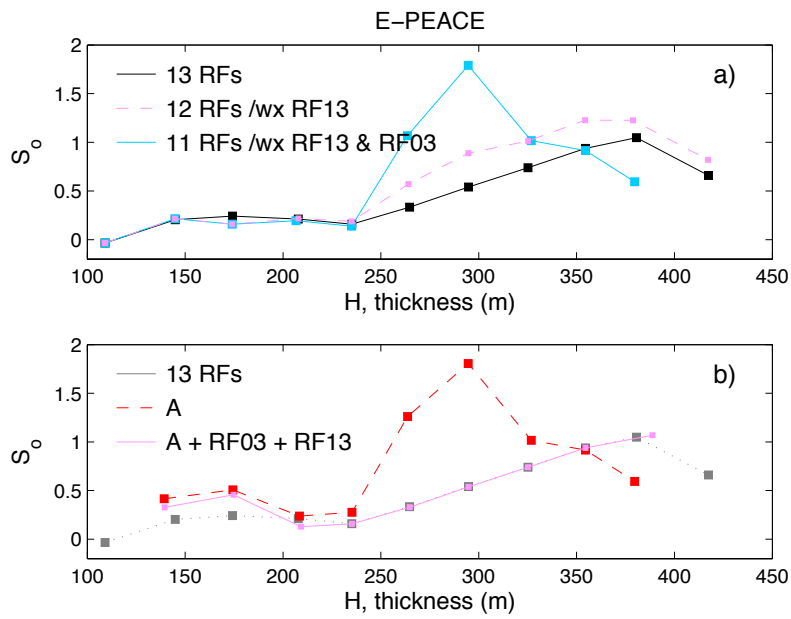

**Figure 9.** The effects of high precipitation (RF03 and RF13) on  $S_o$  estimates. (a)  $S_o$  calculated for 13 flights during E-PEACE in addition to when either, or both, RF03 and RF13 are excluded. RF03 and RF 13 are the flights of high precipitation rates. (b)  $S_o$  is calculated from group A with and without RF03 and RF13.  $R$  and  $N_d$  information for each flight is shown in Fig. 7.

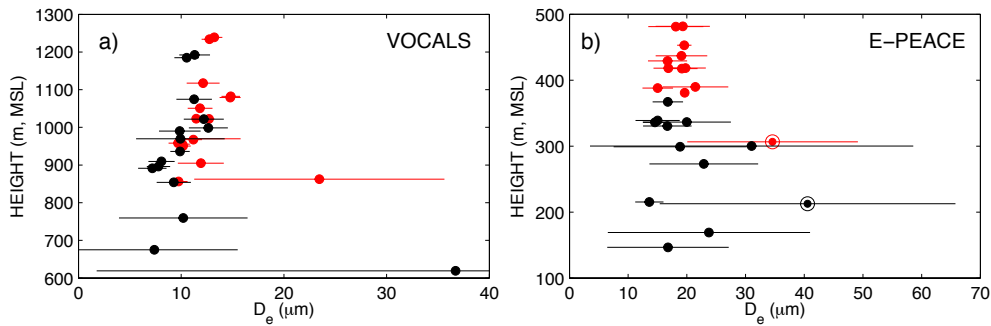

**Figure 10:** Distribution of effective diameters (mean  $\pm 1\sigma$ ) for (a) VOCALS-TO flights and for (b) E-PEACE. Cloud droplets on 11 August are shown as double circles in Fig. 5(b).

Author  
 Deleted:

Author  
 Moved (insertion) [1]

Author  
 Deleted: 5

Author  
 Deleted: (a)

Author  
 Deleted: and (b) radar reflectivity of the Southeast Pacific Sc decks (VOCALS-Rex), sampled from mid-cloud (red) and cloud-base (black) levels. Radar reflectivity with cloud depth is shown in Fig. 5c. The pairs of clouds are connected with lines in Fig. 5b-c, and numbers in Fig. 5c indicate research flight (RF) numbers (see Table 2).

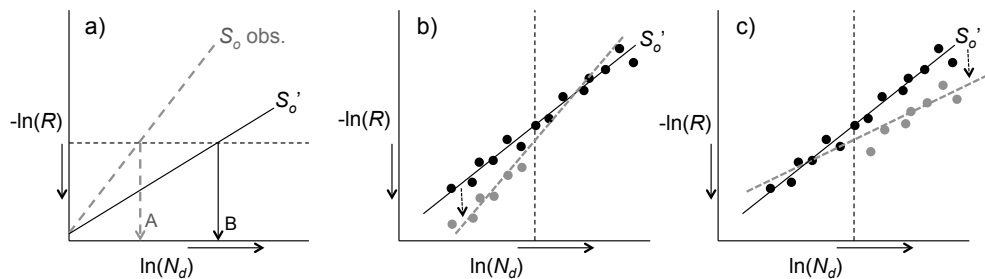

**Figure 11:** A visual description of (a) the effect of wet scavenging and (b-c) the impact of an increase in rainfall rate for a given range of  $N_d$  on  $S_o$  estimates. The solid line represents true (expected)  $S_o$ , whereas the dashed line indicates observed (or responded)  $S_o$ . The A and B in Fig. 7(a) indicate  $N_d$  that are supposed to be for the expected (theoretical)  $S_o$  and responded (observed)  $S_o$ , respectively. The black filled circles in (b-c) indicate the initial (or actual) data and the grey filled circles indicate newly adjusted (responded) data accordingly to the scenario.  $R$  increases downward on y ordinate and  $N_d$  increase toward the right direction on x abscissa.

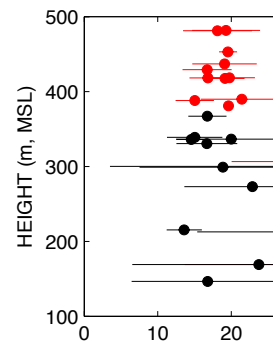

Deleted:

Page Break

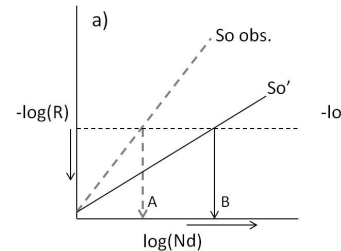

Author

**Moved up [1]:** Cloud droplets on 11 August are shown as double circles.

Author

Deleted: Page Break ... [40]

Author

Deleted: 7

Author

Deleted: the

Author

Deleted: estimate of

Author

Deleted: .

Author

Deleted: in

Author

Deleted: in
